**1 Key features of the genetic architecture and**  
**2 evolution of host-microbe interactions revealed**  
**3 by high-resolution genetic mapping of the**  
**4 mucosa-associated gut microbiome in hybrid**  
**5 mice**

**6 Shauni Doms<sup>1,2</sup>, Hanna Fokt<sup>1,2</sup>, Malte Christoph Rühlemann<sup>3,4</sup>, Cecilia J. Chung<sup>1,2</sup>,**  
**7 Axel Künstner<sup>5</sup>, Saleh Ibrahim<sup>5</sup>, Andre Franke<sup>3</sup>, Leslie M. Turner<sup>7\*†</sup> and John F.**  
**8 Baines<sup>1,2\*†</sup>**

**9** <sup>1</sup> Max Planck Institute for Evolutionary Biology, Plön, Germany

**10** <sup>2</sup> Section of Evolutionary Medicine, Institute for Experimental Medicine, Kiel University, Kiel,  
**11** Germany

**12** <sup>3</sup> Institute for Clinical Molecular Biology (IKMB), Kiel University, Kiel Germany

**13** <sup>4</sup> Institute for Medical Microbiology and Hospital Epidemiology, Hannover Medical School,  
**14** Hannover, Germany

**15** <sup>5</sup> Institute of Experimental Dermatology, University of Lübeck, Lübeck, Germany

**16** <sup>6</sup> Sharjah Institute of Medical Research, Sharjah, UAE

**17** <sup>7</sup> Milner Centre for Evolution, Department of Biology & Biochemistry, University of Bath,  
**18** United Kingdom

**19** \* Correspondence: [l.m.turner@bath.ac.uk](mailto:l.m.turner@bath.ac.uk); [baines@evolbio.mpg.de](mailto:baines@evolbio.mpg.de)

**20** † These authors contributed equally to this work.

**21**        **Abstract:** Determining the forces that shape diversity in host-associated bacterial  
**22** communities is critical to understanding the evolution and maintenance of  
**23** metaorganisms. To gain deeper understanding of the role of host genetics in shaping gut  
**24** microbial traits, we employed a powerful genetic mapping approach using inbred lines  
**25** derived from the hybrid zone of two incipient house mouse species. Further, we  
**26** uniquely performed our analysis on microbial traits measured at the gut mucosal  
**27** interface, which is in more direct contact with host cells and the immune system. A high  
**28** number of mucosa-associated bacterial taxa have significant heritability estimates;  
**29** heritabilities are greater for 16S rRNA transcript- compared to gene copy-based traits,  
**30** and interestingly, are positively correlated with cospeciation rate estimates. Genome-  
**31** wide association mapping identifies 443 loci influencing 123 taxa, with narrow genomic  
**32** intervals pinpointing promising candidate genes and pathways. Importantly, we  
**33** identified an enrichment of candidate genes associated with several human diseases,  
**34** including inflammatory bowel disease, and functional categories including innate  
**35** immunity and G-protein-coupled receptors. These results highlight key features of the  
**36** genetic architecture of mammalian host-microbe interactions and how they diverge as  
**37** new species form.

**38**

**39**        **Keywords:** microbiome; GWAS; cospeciation; codiversification; hybridization;  
**40**        phylosymbiosis

## 41 Introduction

42 The recent widespread recognition of the gut microbiome's importance to host  
43 health and fitness represents a critical advancement of biomedicine. Host phenotypes  
44 affected by the gut microbiome are documented in humans (Ley et al., 2006; Turnbaugh  
45 et al., 2009; Lynch and Pedersen, 2016), laboratory animals (Backhed et al., 2004;  
46 Turnbaugh et al., 2008; Rolig et al., 2015; Rosshart et al., 2017; Gould et al., 2018), and  
47 wild populations (Suzuki, 2017; Roth et al., 2019; Suzuki et al., 2020; Hua et al., 2020),  
48 and include critical traits such as aiding digestion and energy uptake (Rowland et al.,  
49 2018), and the development and regulation of the immune system (Davenport, 2020).

50 Despite the importance of gut microbiome, community composition varies  
51 significantly among host species, populations, and individuals (Benson et al., 2010;  
52 Yatsunenکو et al., 2012; Brooks et al., 2016; Rehman et al., 2016; Amato et al., 2019).  
53 While a portion of this variation is expected to be selectively neutral, alterations of the  
54 gut microbiome are on the one hand linked to numerous human diseases (Carding et al.,  
55 2015; Lynch and Pedersen, 2016) such as diabetes (Qin et al., 2012), inflammatory bowel  
56 disease (IBD) (Ott et al., 2004; Gevers et al., 2014) and mental disorders (Clapp et al.,  
57 2017). On the other hand, there is evidence that the gut microbiome can play an  
58 important role in adaptation on both recent- (Hehemann et al., 2010; Suzuki and Ley,  
59 2020) and ancient evolutionary timescales (). Collectively, these phenomena suggest that  
60 it would be evolutionarily advantageous for hosts to influence their microbiome.

61 An intriguing observation made in comparative microbiome research in the last  
62 decade is that the pattern of diversification among gut microbiomes appears to mirror  
63 host phylogeny (Ochman et al., 2010). This phenomenon, coined "phylosymbiosis"  
64 (Brucker and Bordenstein, 2012a; Brucker and Bordenstein, 2012b; Lim and Bordenstein,  
65 2020), is documented in a number of diverse host taxa (Brooks et al., 2016) and also  
66 extends to the level of the phageome (Gogarten et al., 2021). Several non-mutually  
67 exclusive hypotheses are proposed to explain phylosymbiosis (Moran and Sloan, 2015).  
68 However, it is likely that vertical inheritance is important for at least a subset of taxa, as  
69 signatures of co-speciation/-diversification are present among numerous mammalian  
70 associated gut microbes (Moeller et al., 2016; Groussin et al., 2017; Moeller et al., 2019),  
71 which could also set the stage for potential coevolutionary processes. Importantly,  
72 experiments involving interspecific fecal microbiota transplants indeed provide  
73 evidence of host adaptation to their conspecific microbial communities (Brooks et al.,  
74 2016; Moeller et al., 2019). Further, cospeciating taxa were observed to be significantly  
75 enriched among the bacterial species depleted in early onset IBD, an immune-related  
76 disorder, suggesting a greater evolved dependency on such taxa (Papa et al., 2012;  
77 Groussin et al., 2017). However, the nature of genetic changes involving host-microbe  
78 interactions that take place as new host species diverge remains under-explored.

79 House mice are an excellent model system for evolutionary microbiome research, as  
80 studies of both natural populations and laboratory experiments are possible (Suzuki,

81 2017; Suzuki et al., 2019). In particular, the house mouse species complex is comprised of  
82 subspecies that hybridize in nature, enabling the potential early stages of  
83 codiversification to be studied. We previously analyzed the gut microbiome across the  
84 central European hybrid zone of *Mus musculus musculus* and *M. m. domesticus* (Wang et  
85 al., 2015), which share a common ancestor ~ 0.5 million years ago (Geraldès et al., 2008).  
86 Importantly, transgressive phenotypes (i.e. exceeding or falling short of parental values)  
87 among gut microbial traits as well as increased intestinal histopathology scores were  
88 common in hybrids, suggesting that the genetic basis of host control over microbes has  
89 diverged (Wang et al., 2015). The same study performed an F<sub>2</sub> cross between wild-  
90 derived inbred strains of *M. m. domesticus* and *M. m. musculus* and identified 14  
91 quantitative trait loci (QTL) influencing 29 microbial traits. However, like classical  
92 laboratory mice, these strains had a history of rederivation and reconstitution of their  
93 gut microbiome, thus leading to deviations from the native microbial populations found  
94 in nature (Rosshart et al., 2017; Org and Lusi, 2018), and the genomic intervals were too  
95 large to identify individual genes.

96 In this study, we employed a powerful genetic mapping approach using inbred  
97 lines directly derived from the *M. m. musculus* - *M. m. domesticus* hybrid zone, and  
98 further focus on the mucosa-associated microbiota due to its more direct interaction  
99 with host cells (Fukata and Arditi, 2013; Chu and Mazmanian, 2013), distinct functions  
100 compared to the luminal microbiota (Wang et al., 2010; Vaga et al., 2020), and greater  
101 dependence on host genetics (Spor et al., 2011; Linnenbrink et al., 2013). Previous  
102 mapping studies using hybrids raised in a laboratory environment showed that high  
103 mapping resolution is possible due to the hundreds of generations of natural admixture  
104 between parental genomes in the hybrid zone (Turner and Harr, 2014; Pallares et al.,  
105 2014; Škrabar et al., 2018). Accordingly, we here identify 443 loci contributing to  
106 variation in 123 taxa, whose narrow genomic intervals (median <2Mb) enable many  
107 individual candidate genes and pathways to be pinpointed. We identify a high  
108 proportion of bacterial taxa with significant heritability estimates, and find that bacterial  
109 phenotyping based on 16S rRNA transcript compared to gene copy-based profiling  
110 yields an even higher proportion. Further, these heritability estimates also significantly  
111 positively correlate with cospeciation rate estimates, suggesting a more extensive host  
112 genetic architecture for cospeciating taxa. Finally, we identify numerous enriched  
113 functional pathways, whose role in host-microbe interactions may be particularly  
114 important as new species form.

## 115 Results

### 116 *Microbial community composition*

117 To obtain microbial traits for genetic mapping in the G2 mapping population, we  
118 sequenced the 16S rRNA gene from caecal mucosa samples of 320 hybrid male mice  
119 based on DNA and RNA (cDNA), which reflect bacterial cell number and activity,  
120 respectively. After applying quality filtering and subsampling 10,000 reads per sample,  
121 we identified a total of 4684 amplicon sequence variants (ASVs). For further analyses,  
122 we established a "core microbiome" (defined in Methods), such that analyses were  
123 limited to those taxa common and abundant enough to reveal potential genetic signal.  
124 The core microbiome is composed of four phyla, five classes, five orders, eleven families,  
125 27 genera, and 90 ASVs for RNA, and four phyla, five classes, six orders, twelve families,  
126 28 genera and 46 ASVs for DNA. A combined total of 98 unique ASVs belong to the core,  
127 of which 38 were shared between DNA and RNA (Suppl. Fig. 1). The most abundant  
128 genus in our core microbiome is *Helicobacter* (Suppl. Fig. 2), consistent with a previous  
129 study of the wild hybrid *M. m. musculus*/*M. m. domesticus* mucosa-associated  
130 microbiome (Wang et al., 2015).

### 131 *Correlation between host genetic relatedness and microbiome structure*

132 To gain a broad sense of the contribution of genetic factors to the variability of  
133 microbial phenotypes in our mapping population, we compared the kinship matrix  
134 based on genotypes to an equivalent based on gut microbial composition, whereby ASV  
135 abundances were used as equivalents of gene dosage. We found a significant correlation  
136 between these matrices ( $P = .001$ ; Suppl. Fig. 3), indicating a host genetic effect on the  
137 diversity of the gut microbiota.

### 138 *SNP-based heritability*

139 Next, we used a SNP-based approach to estimate the proportion of variance  
140 explained (PVE) of the relative abundance of taxa, also called the narrow-sense  
141 heritability ( $h^2$ ) or SNP-based heritability. Out of the 153 total core taxa, we identified 46  
142 taxa for DNA and 69 taxa for RNA with significant heritability estimates ( $P_{RLRT} < .05$ ),  
143 with estimates ranging between 29 and 91% (see Fig. 1A-B and Suppl. Table 1). An  
144 unclassified genus belonging to the phylum Bacteroidetes followed by ASV7 (genus  
145 *Paraprevotella*), *Paraprevotella* and Paraprevotellaceae showed the highest heritability  
146 among DNA-based traits (91.8%, 88.8%, 88.8%, and 87.1%, respectively; Fig. 1A), while  
147 ASV97 (genus *Oscillibacter*), followed by Prevotellaceae, *Paraprevotella* and ASV7  
148 (*Paraprevotella*) had the highest heritability among RNA-based traits (86.6%, 85.7%,  
149 85.7%, and 85.6%, resp.; Fig. 1B). The heritability estimates for DNA- and RNA-based  
150 measurements of the same taxa are significantly correlated ( $P = 5.013 \times 10^{-8}$ ,  $R^2=0.58$ ,  
151 Suppl. Fig. 4), and neither measure appears to be systematically more heritable than

152 another, i.e. some taxa display higher RNA-based heritability estimates and others  
 153 higher DNA-based estimates.

154 *Heritability estimates are correlated with predicted co-speciation rates*

155 In an important meta-analysis of the gut microbiome across diverse mammalian  
 156 taxa, Groussin et al. (2017) estimated co-speciation rates of individual bacterial taxa by  
 157 measuring the congruence of host and bacteria phylogenetic trees relative to the number  
 158 of host-swap events. We reasoned that taxa with higher co-speciation rates might also  
 159 demonstrate higher heritability, as these more intimate evolutionary relationships would  
 160 provide a greater opportunity for genetic aspects to evolve. Intriguingly, we observe a  
 161 significant positive correlation for RNA-based traits ( $P = .008$ ,  $R^2 = .46$ , Fig. 1D) and a  
 162 similar trend for DNA ( $P = 0.1$ ; Fig. 1C). These results support the notion that  
 163 cospeciating taxa evolved a greater dependency on host genes, and further suggest that  
 164 bacterial activity may better reflect the underlying biological interactions.

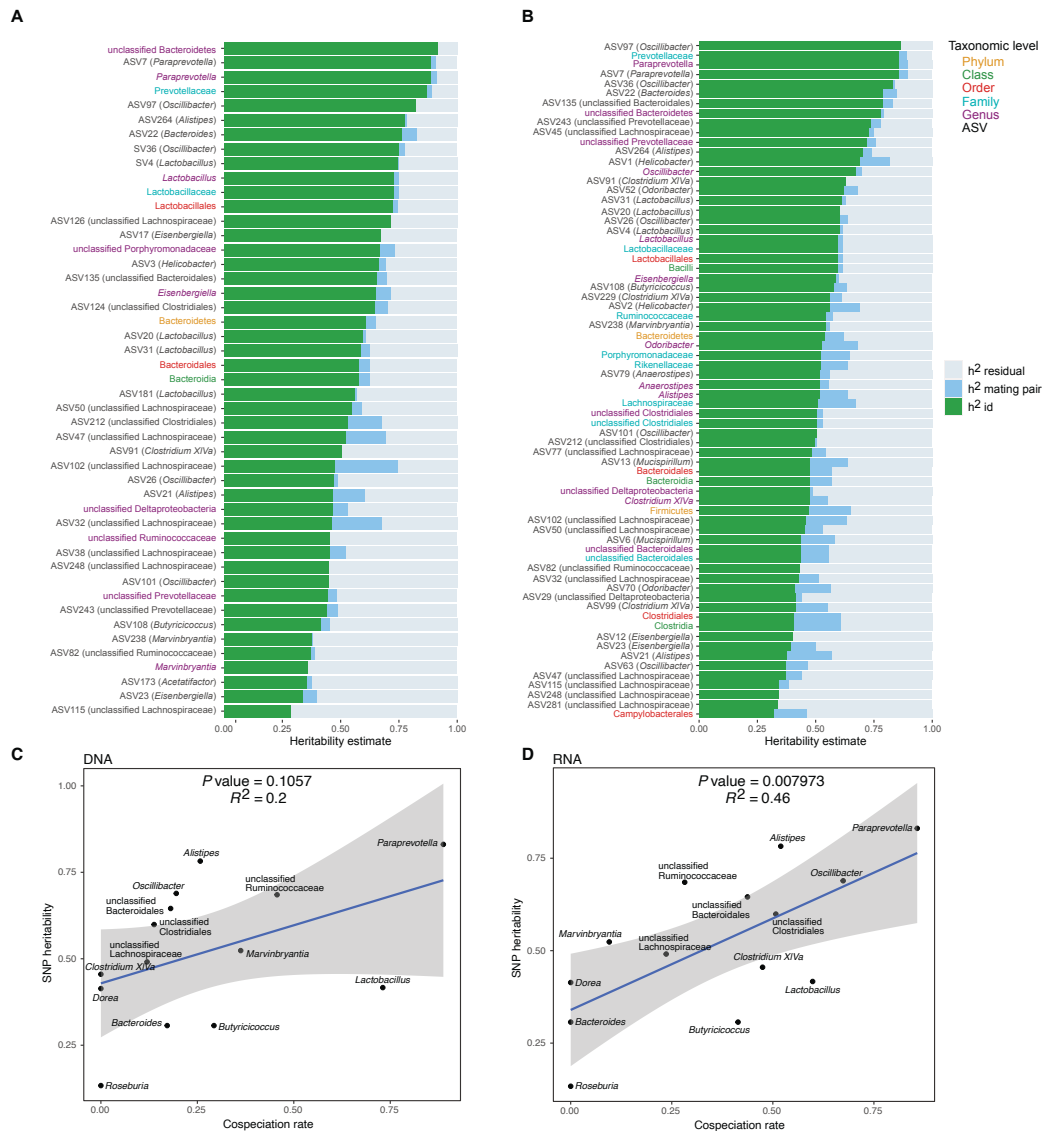

**165**        **Figure 1:** (A-B) Heritability estimates for the relative abundance of bacterial taxa. Proportion  
**166** of variance explained for each taxon on DNA level (A), and RNA level (B) for all SNPs (GRM) in  
**167** green, mating pair identifier in blue and residual variance in grey. Only significant heritability  
**168** estimates are shown ( $P < .05$ ). The text labels on the y-axis are colored according to taxonomic  
**169** level: ASV in black, genus in purple, family in light blue, order in red, class in green, and phylum  
**170** in yellow. (C-D) Relationship between the heritability estimates for the relative abundance of  
**171** bacterial taxa and co-speciation rate for the same genus calculated by Groussin et al. (2017). DNA  
**172** level (C), and RNA level (D). The blue line represents a linear regression fit to the data and the  
**173** grey area the corresponding confidence interval.

**174**        *Genetic mapping of host loci determining microbiome composition*

**175**        Next, we performed genome-wide association mapping of the relative abundances  
**176** of core taxa, in addition to two alpha-diversity measures (Shannon and Chao1 indices),  
**177** based on 32,625 SNPs. We included both additive and dominance terms in the model to  
**178** enable the identification of under- and over-dominance (see Methods). While we found  
**179** no significant associations for alpha diversity at either the DNA or RNA level ( $P > 1.53 \times$   
**180**  $10^{-6}$ ), a total of 1099 genome-wide significant associations were identified for individual  
**181** taxa ( $P < 1.53 \times 10^{-6}$ , Suppl. Table 2), of which 443 achieved study-wide significance ( $P$   
**182**  $< 1.29 \times 10^{-8}$ ). Apart from the X chromosome, all autosomal chromosomes contained  
**183** study-wide significant associations (Fig. 2). Out of the 153 mapped taxa, 123 had at least  
**184** one significant association (Table 1). For the remainder of our analyses, we focus on the  
**185** results using the more stringent study-wide threshold, and combined significant SNPs  
**186** within 10 Mb into significant regions (Suppl. Table 3). The median size of significant  
**187** regions is 1.91 Mb, which harbor a median of 14 protein-coding genes. On average, we  
**188** observe 10 significant mouse genomic regions per bacterial taxon.

**189**        Of the significant loci with estimated interval sizes, we find 73 intervals (16.5%) that  
**190** are smaller than one Mb (Suppl. Table 4). The smallest interval is only 231 bases and  
**191** associated with the RNA-based abundance of an unclassified genus belonging to  
**192** Deltaproteobacteria. It is situated in an intron of the C3 gene, a complement component  
**193** playing a central role in the activation of the complement system, which modulates  
**194** inflammation and contributes to antimicrobial activity (Ricklin et al., 2016).

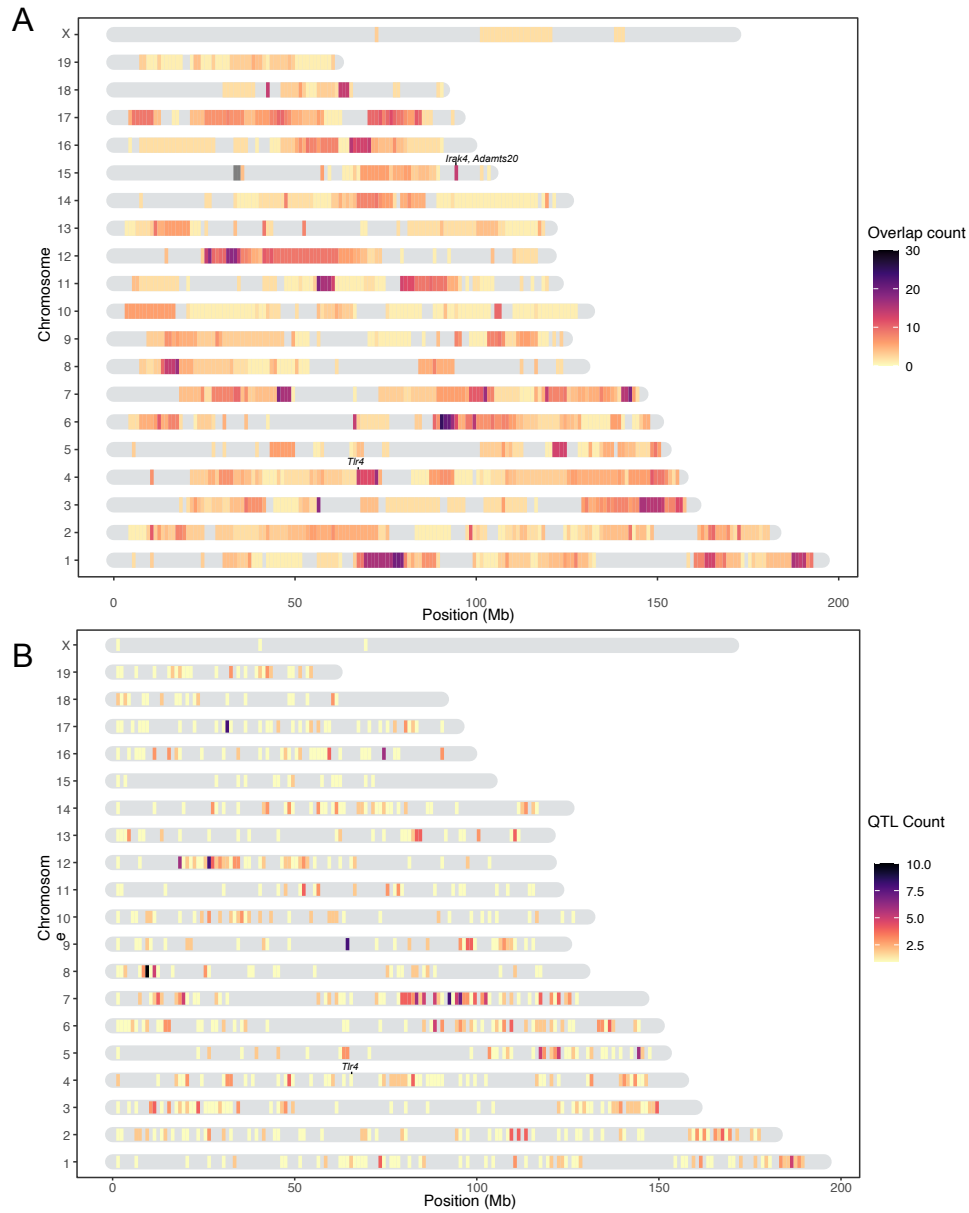

195 Figure 2: Heatmap of significant host loci from association mapping of bacterial  
196 abundances. Karotype plot showing the number of significant loci found using a study-  
197 wide threshold, where (A) plots the significance intervals, and (B) the significant SNP  
198 markers on the chromosomes.



**199** Table. 1. Overview of mapping statistics.

|            | DNA                                      | RNA  | Total |      |
|------------|------------------------------------------|------|-------|------|
| <b>200</b> |                                          |      |       |      |
| <b>201</b> | Mapped taxa                              | 101  | 142   | 153  |
| <b>202</b> | Taxa with significant loci               | 67   | 96    | 123  |
| <b>203</b> | Median interval size (Mb)                | 1.52 | 2.29  | 1.91 |
| <b>204</b> | Total significant loci                   | 478  | 791   | 1269 |
| <b>205</b> | Unique significant loci                  | 179  | 313   | 443  |
| <b>206</b> | Significant loci total $P$               | 91   | 167   | 233  |
| <b>207</b> | Significant loci additive $P$            | 155  | 260   | 377  |
| <b>208</b> | Significant loci dominance $P$           | 95   | 166   | 231  |
| <b>209</b> | Median significant loci per trait        | 5    | 6     | 8    |
| <b>210</b> | Median unique significant loci per trait | 3    | 3     | 4    |
| <b>211</b> | Median unique significant SNPs per locus | 2    | 2.5   | 2    |
| <b>212</b> | Median number of genes per locus         | 31   | 52    | 43   |
| <b>213</b> | Median protein coding genes per locus    | 11   | 15    | 14   |

**214** The significant genomic regions and SNPs are displayed in Figure 2A and 2B,  
**215** respectively. Individual SNPs were associated with up to 12 taxa, and significant  
**216** intervals with up to 30 taxa. The SNPs with the lowest  $P$  values were associated with the  
**217** genus *Dorea* and two ASVs belonging to *Dorea* (ASV184 and ASV293; Suppl. Fig. 5). At  
**218** the RNA level this involves two loci: mm10-chr4: 67.07 Mb, where the peak SNP is 13 kb  
**219** downstream of the closest gene *Tlr4* (UNC7414459,  $P=2.31 \times 10^{-69}$ , additive  $P= 4.48 \times$   
**220**  $10^{-118}$ , dominance  $P= 1.37 \times 10^{-111}$ ), and mm10-chr15: 94.4 Mb, where the peak SNP is  
**221** found within the *Adamts20* gene (UNC26145702,  $P=4.51 \times 10^{-65}$ , additive  $P= 1.87 \times 10^{-113}$ ,  
**222** dominance  $P= 1.56 \times 10^{-105}$ ; Fig. 2; Suppl. Fig. 5). Interestingly, the *Irak4* gene, whose  
**223** protein product is rapidly recruited after TLR4 activation, is also located 181 kb  
**224** upstream of *Adamts20*. The five taxa displaying the most associations were ASV19  
**225** (*Bacteroides*), *Dorea*, ASV36 (*Oscillibacter*), ASV35 (*Bacteroides*), and ASV98 (unclassified  
**226** Lachnospiraceae) (Suppl. Fig. 6).

**227** *Ancestry, dominance, and effect sizes*

**228** A total of 435 significant SNPs were ancestry informative between *M. m. musculus*  
**229** and *M. m. domesticus* (*i.e.* represent fixed differences between subspecies). To gain further  
**230** insight on the genetic architecture of microbial trait abundances, we estimated the  
**231** degree of dominance at each significant locus using the  
**232**  $d/a$  ratio (Falconer, 1996), where alleles with strictly recessive, additive, and dominant  
**233** effects have  $d/a$  values of -1, 0, and 1, respectively. As half of the SNPs were not ancestry  
**234** informative (Fig. 3A), it was not possible to consistently have  $a$  associated with one  
**235** parent/subspecies, hence we report  $d/|a|$  such that it can be interpreted with respect to  
**236** bacterial abundance. For the vast majority of loci (83.53%), the allele associated with  
**237** lower abundance is dominant or partially dominant ( $-1.25 < d/|a| < -0.75$ ; Fig. 3B). On  
**238** the basis of the arbitrary cutoffs we used to classify dominance, only a small proportion

239 of alleles are underdominant (0.22%;  $d/|a| < -1.25$ ) or overdominant (0.15%;  $d/|a| >$   
 240 1.25). However for one-third of the significant SNPs, the heterozygotes display  
 241 transgressive phenotypes, i.e. mean abundances that are either significantly lower (31%  
 242 of SNPs)- or higher (2% of SNPs) than those of both homozygous genotypes.  
 243 Interestingly, the *domesticus* allele was associated with higher bacterial abundance in  
 244 two-thirds of this subset (33.2% vs 16.3% *musculus* allele; Fig. 3A).

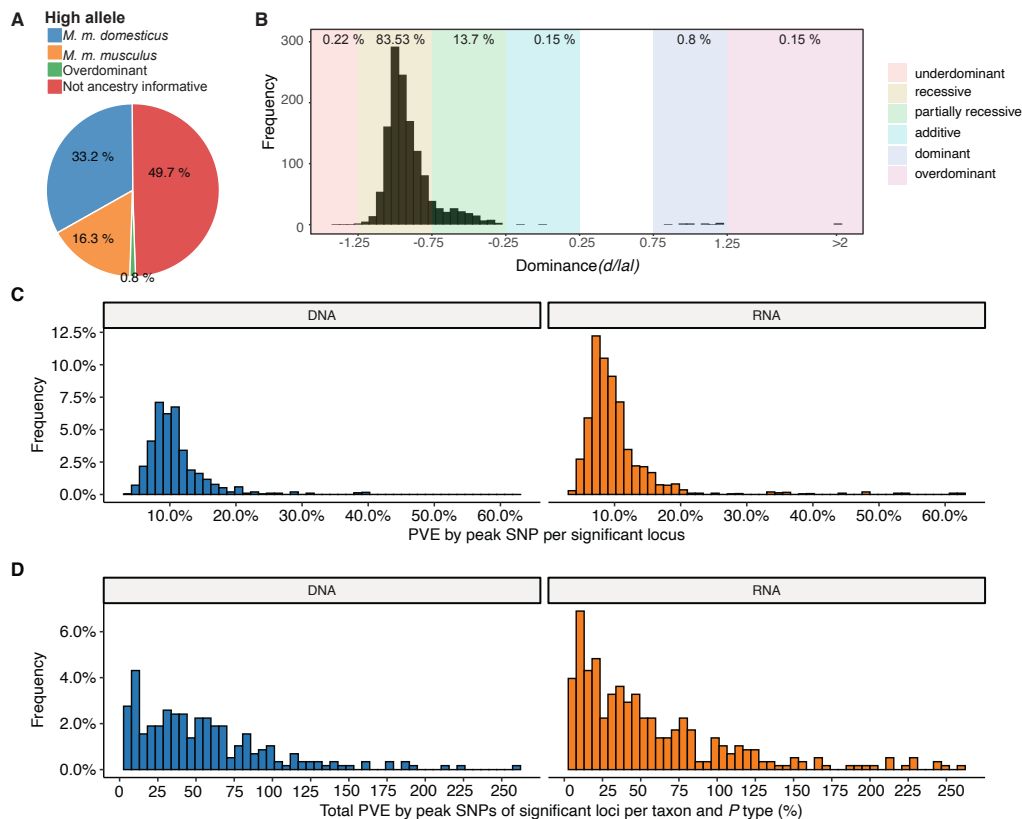

245 **Figure 3:** Genetic architecture of significant loci. A) Source of the allele with the highest phenotypic value. B) Histogram of dominance values  $d/a$  of significant loci reveals a majority of loci acting recessive or partially recessive. C) Histogram showing the percentage of variance explained (PVE) by the peak SNP for DNA (blue, left) and RNA (orange, right). D) Collective PVE by lead SNPs of significant loci within a taxon. Values are calculated separately for each *P* value type (total, additive, and dominance).

251 Next, we estimated phenotypic effect sizes by calculating the percentage variance  
 252 explained (PVE) by the peak SNP of each significant region. Peak SNPs explain between  
 253 3% and 64% of the variance in bacterial abundance, with a median effect size of 9.3%  
 254 (Fig. 3C). The combined effects of all significant loci for each taxon ranged from 4.9% to  
 255 259%, with a median of 41.8% (Fig. 3D). Note, combined effects for many taxa (33 out of  
 256 59) exceed SNP-heritability estimates (Fig. 1). While exceeding 100% explained variance  
 257 is biologically possible, as loci can have opposite phenotypic effects, many of these are  
 258 likely inflated due to the Beavis effect (Beavis, 1994).

**259** *Functional annotation of candidate genes*

**260** In order to reveal potential higher level biological phenomena among the identified  
**261** loci, we performed pathway analysis to identify interactions and functional categories  
**262** enriched among the genes in significant intervals. We used STRING (Szklarczyk et al.,  
**263** 2019) to calculate a protein-protein interaction (PPI) network of 925 protein-coding  
**264** genes nearest to significant SNPs (upstream and/or downstream). A total of 768 genes  
**265** were represented in the STRING database, and the maximal network is highly  
**266** significant (PPI enrichment  $P$  value:  $2.15 \times 10^{-14}$ ) displaying 668 nodes connected by 1797  
**267** edges and an average node degree of 4.68. After retaining only the edges with the  
**268** highest confidence (interaction score  $> 0.9$ ), this results in one large network with 233  
**269** nodes, 692 edges and ten smaller networks (Fig. 4).

**270** Next, we functionally annotated clusters using STRING's functional enrichment  
**271** plugin. The genes of the largest cluster are part of the G protein-coupled receptor  
**272** (GPCR) ligand binding pathway. GPCRs are the largest receptor superfamily and also  
**273** the largest class of drug targets (Sriram and Insel, 2018). We then calculated the top ten  
**274** hub proteins from the network based on Maximal Clique Centrality (MCC) algorithm  
**275** with CytoHubba to predict important nodes that can function as 'master switches'  
**276** (Suppl. Fig. 7). The top ten proteins contributing to the PPI network were GNG12,  
**277** MCHR1, NMUR2, PROK2, OXTR, XCR1, TACR3, CHRM3, PTGFR, and C3, which are  
**278** all involved in the GPCR signaling pathway.

**279** Further, we performed enrichment analysis on the 925 genes nearest to significant  
**280** SNPs using the *clusterprofiler* R package. We found 14 KEGG pathways to be over-  
**281** represented: circadian entrainment, oxytocin signaling pathway, axon guidance, calcium  
**282** signaling, cAMP signaling, cortisol synthesis and secretion, cushing syndrome, gastric  
**283** acid secretion, glutamatergic synapse, mucin type O-glycan biosynthesis, inflammatory  
**284** mediator regulation of TRP channels, PD-L1 expression and the PD-1 checkpoint  
**285** pathway in cancer, tight junction, and the *Wnt* signaling pathway (Suppl. Table 5, Suppl.  
**286** Fig. 8-9). Finally, genes involved in five human diseases are enriched, among them  
**287** mental disorders (Suppl. Fig. 10).

**288** Finally, due to the observation of a significant enrichment of cospeciating taxa  
**289** among the bacterial species depleted in early onset IBD (Groussin et al., 2017) and the  
**290** evidence that IBD is especially associated with a dysbiosis in mucosa-associated  
**291** communities (Yang et al., 2020a; Daniel et al., 2021), we specifically examined possible  
**292** over-representation of genes involved in IBD (Khan et al., 2021) among the 925 genes  
**293** neighboring significant SNPs. We found 14 out of the 289 IBD genes, which was  
**294** significantly more than expected by chance (10 000 times permuted mean: 2.7, simulated  
**295**  $P = .0001$ ; Suppl. Table 6). Interestingly, SNPs in five out of the 14 genes are associated  
**296** with ASVs belonging to the genus *Oscillibacter*, a cospeciating taxon known to decrease  
**297** during the active state of IBD (Metwaly et al., 2020).

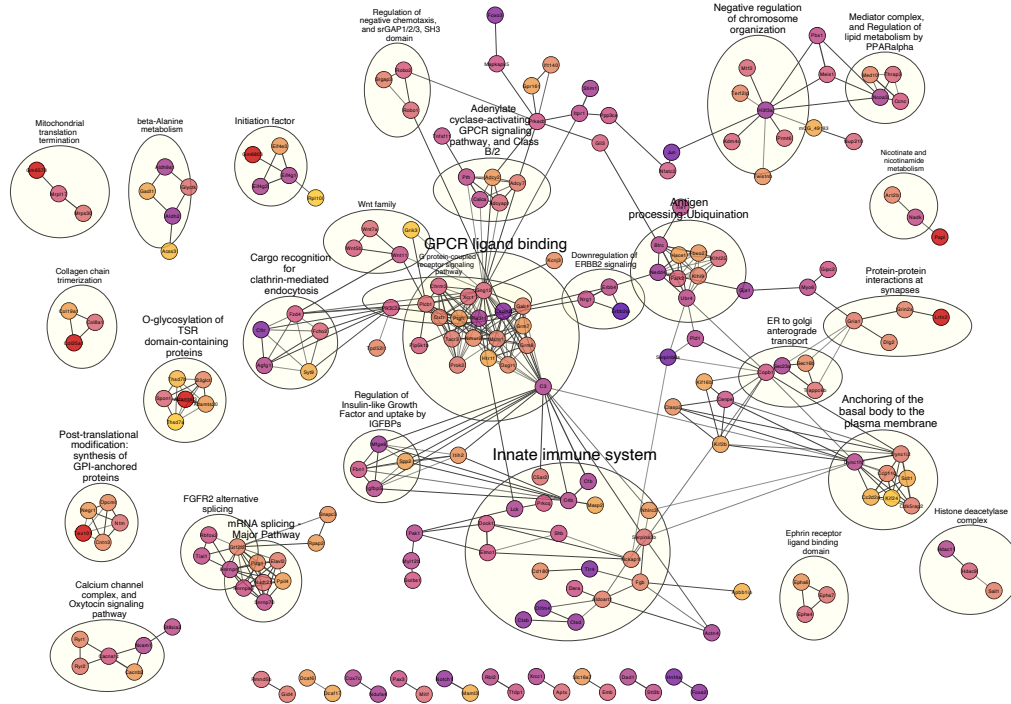

**298** Figure 4: High confidence protein-protein interaction network of genes closest to SNPs  
**299** significantly associated with bacterial abundances. Network clusters are annotated using  
**300** STRING's functional enrichment (Doncheva et al., 2019). Nodes represent proteins and  
**301** edges their respective interactions. Only edges with an interaction score higher than 0.9  
**302** are retained. The width of the edge line expresses the interaction score calculated by  
**303** STRING. The color of the nodes describe the expression of the protein in the intestine  
**304** where yellow is not expressed and purple is highly expressed.

**305** *Comparison of significant loci to published gut microbiome mapping studies*

**306** Next, we compiled a list of 648 unique confidence intervals of significant  
**307** associations with gut bacterial taxa from seven previous mouse QTL studies (Benson et  
**308** al., 2010; McKnite et al., 2012; Leamy et al., 2014; Wang et al., 2015; Org et al., 2015;  
**309** Snijders et al., 2016; Kemis et al., 2019) and compared this list to our significance  
**310** intervals for bacterial taxa at both the DNA and RNA level (346 unique intervals).  
**311** Regions larger than 10Mb were removed from all studies. We found 434 overlapping  
**312** intervals, which is significantly more than expected by chance (10 000 times permuted  
**313** mean: 368, simulated  $P=0.0073$ , see Methods). Several of our smaller significant loci  
**314** overlapped with larger loci from previous studies and removing this redundancy left  
**315** 186 significant loci with a median interval size of 0.78 Mb (Fig. 5). The most frequently  
**316** identified locus is located on chromosome 2 169-171 Mb where protein coding genes  
**317** *Gm11011*, *Znf217*, *Tshz2*, *Bcas1*, *Cyp24a1*, *Pfdn4*, *4930470P17Rik*, and *Dok5* are situated.

**318** Additionally, we collected genes within genome-wide significant regions reported  
**319** in seven human microbiome GWAS (mGWAS) (Bonder et al., 2016; Turpin et al., 2016;

320 Goodrich et al., 2016; Wang et al., 2016; Hughes et al., 2020; Rühlemann et al., 2021;  
321 Kurilshikov et al., 2021). However, no significant over-representation of genes was  
322 found within our significance intervals ( $P = .156$ ), nor within our list of genes closest to a  
323 significant SNP ( $P = .62$ ).

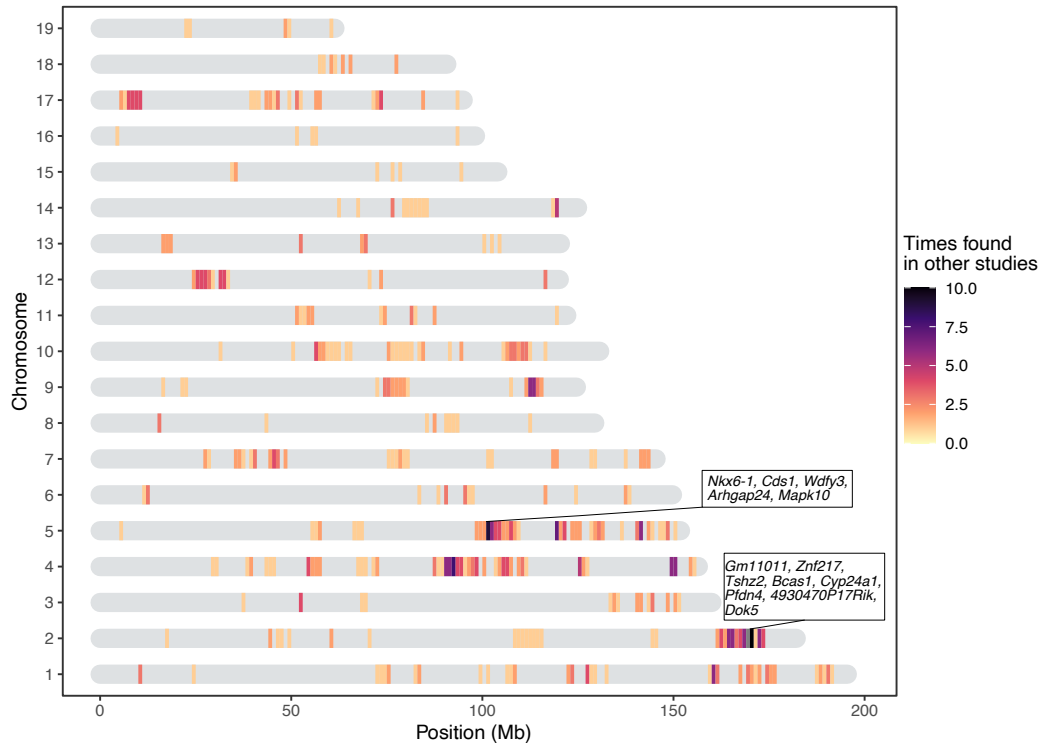

324 **Figure 5:** Heatmap showing the significant loci in this study that were previously  
325 found in other QTL studies of the mouse gut microbiome. The genes present in  
326 two repeatedly identified regions are depicted in boxes.

### 327 *Proteins differentially expressed in germ-free vs conventional mice*

328 To further validate our results, we compared the list of genes contained within  
329 intervals of our study to a list of differentially expressed protein between germ-free and  
330 conventionally raised mice (Mills et al., 2020). This comparison was made based on the  
331 general expectation that genes associated with variation in microbial abundances would  
332 be more likely to differ according to the colonization status of the host. Thus, we  
333 examined the intersection between genes identified in our study and the proteins  
334 identified as highly associated ( $|\pi| > 1$ ) with the colonization state of the colon and the  
335 small intestine (Mills et al., 2020). Out of the 373 over- or under-expressed proteins  
336 according to colonization status, we find 198 of their coding genes to be among our  
337 significant loci, of which 17 are the closest genes to a significant marker (*Iyd*, *Nln*,  
338 *Slc26a3*, *Slc3a1*, *Myom2*, *Nebl*, *Tent5a*, *Fxr1*, *Cbr3*, *Chrodc1*, *Nucb2*, *Arhgef10l*, *Sucla2*, *Enpep*,  
339 *Prkca*, *Aacs*, and *Cox7c*). This is significantly more than expected by chance (simulated  
340  $P = .0156$ , 10 000 permutations). Further, analyzing the protein-protein interactions with  
341 STRING results in a significant network ( $P = 1.73 \times 10^{-14}$ , and average node degree 2.4,

342 Suppl. Fig. 11), with *Cyp2c65*, *Cyp2c55*, *Cyp2b10*, *Gpx2*, *Cth*, *Eif3k*, *Eif1*, *Sucla2*, and *Rpl17*  
343 identified as hub genes (Suppl. Fig. 12).

344 Subsequently, we merged the information from Mills et al. (2020) and the seven  
345 previous QTL mapping studies discussed above to further narrow down the most  
346 promising candidate genes, and found 30 genes overlapping with our study. Of these 30  
347 genes, six are the closest gene to a significant SNP. These genes are myomesine 2  
348 (*Myom2*), solute carrier family 3 member 1 (*Slc3a1*), solute carrier family 26 member 3  
349 (*Slc26a3*), nebulin (*Neb1*), carbonyl reductase 3 (*Cbr3*), and acetoacetyl-coA synthetase  
350 (*Aacs*).

### 351 *Candidate genes influencing bacterial abundance*

352 Finally, all previously mentioned candidate genes were combined in one gene set of  
353 304 genes and compiled in a highly significant PPI network ( $P < 1.0 \times 10^{-16}$ , average node  
354 degree=4.85, see Methods 4.13). Guided by this network, we filtered out genes situated  
355 in the same genomic region and kept the gene with the highest connectivity and  
356 supporting information (original network see Suppl. Fig. 13). This gave a resulting gene  
357 set of 80 candidate genes (Fig. 6 and Suppl. Table 7). The G protein, GNG12 and the  
358 complement component 3 C3, are the proteins with the most edges in the network (30  
359 and 25, respectively), followed by MCHR1, CXCL12, and NMUR2 with each 18 edges.  
360 Of these 80 highly connected genes, 66 are associated with bacteria that are either co-  
361 speciating (co-speciation rate  $> 0.5$ ; Groussin et al., 2017) and/or have high heritability  
362 ( $> 0.5$ ) suggesting a functionally important role for these bacterial taxa (Suppl. Table 7).

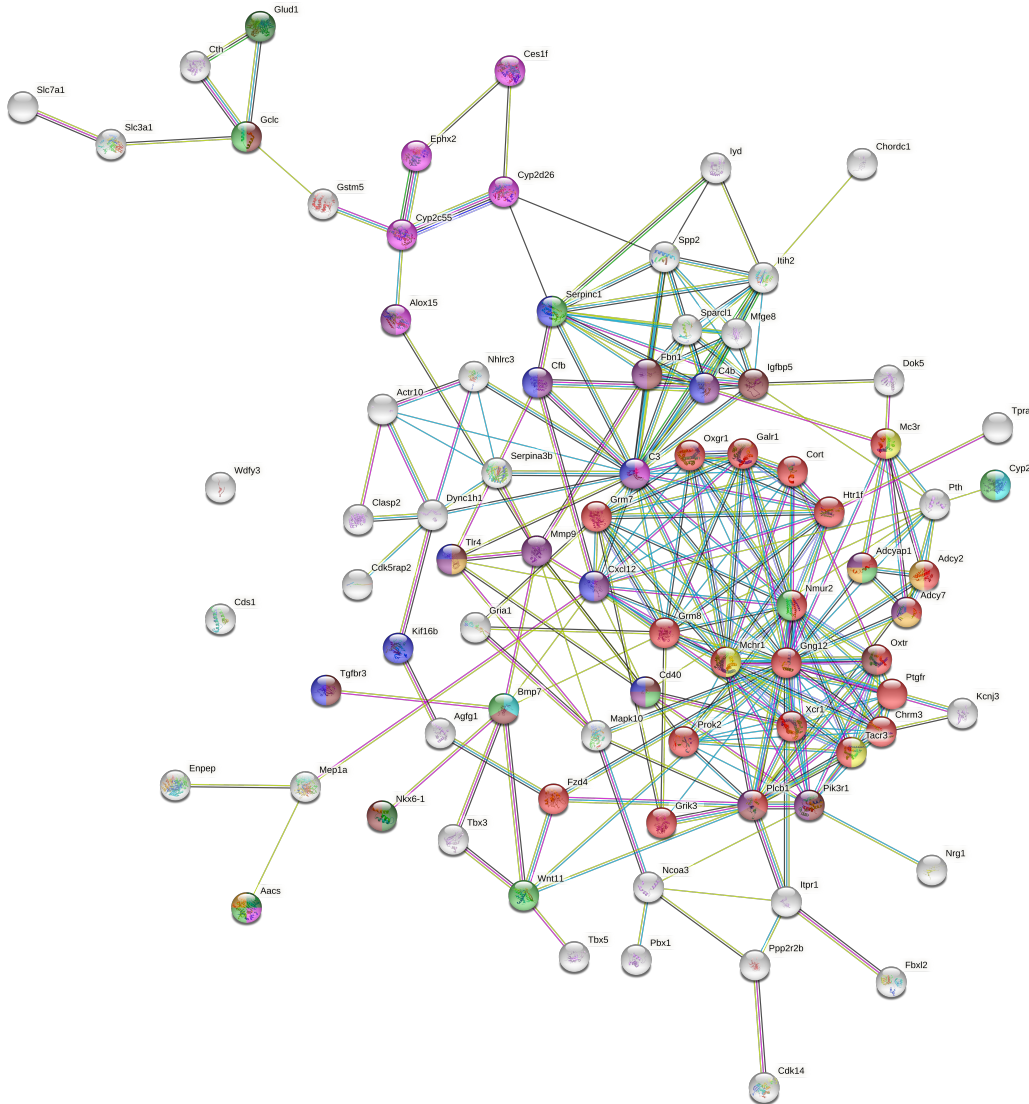

363 **Figure 6:** Network of host candidate genes influencing bacterial traits using  
364 STRING (<https://string-db.org>). The nodes represent proteins and are colored ac-  
365 cording to a selection of enriched GO terms and pathways: G protein coupled re-  
366 ceptor (GPCR) signaling (red), regulation of the immune system process (blue), re-  
367 sponse to nutrient levels (light green), fatty acid metabolic process (pink), glucose  
368 homeostasis (purple), response to antibiotic (orange), regulation of feeding behavior  
369 (yellow), positive regulation of insulin secretion (dark green), circadian entrainment  
370 (brown), and response to vitamin D (turquoise). The color of the edges represents  
371 the interaction type: known interactions from curated databases (turquoise) or ex-  
372 perimentally determined (pink); predicted interactions from gene neighborhood  
373 (green), gene fusions (red), gene co-occurrence (blue); other interactions from text-  
374 mining (light green), co-expression (black), and protein homology (purple).

## 375 Discussion

376 Understanding the forces that shape variation in host-associated bacterial  
377 communities within host species is key to understanding the evolution and maintenance  
378 of meta-organisms. Although numerous studies in mice and humans demonstrate that  
379 host genetics influences gut microbiota composition (McKnite et al., 2012; Leamy et al.,  
380 2014; Goodrich et al., 2014; Org et al., 2015; Davenport et al., 2015; Wang et al., 2016;  
381 Bonder et al., 2016; Goodrich et al., 2016; Kemis et al., 2019; Suzuki et al., 2019; Ishida et  
382 al., 2020; Hughes et al., 2020; Rühlemann et al., 2021), our study is unique in a number of  
383 important ways. First, the unique genetic resource of mice collected from a naturally  
384 occurring hybrid zone together with their native microbes yielded extremely high  
385 mapping resolution and the possibility to uncover ongoing evolutionary processes in  
386 nature. Second, our study is the first to perform genetic mapping of 16S rRNA  
387 transcripts in the gut environment, which was previously shown to be superior to DNA-  
388 based profiling in a genetic mapping study of the skin microbiota (Belheouane et al.,  
389 2017). Third, our study is one of the only to specifically examine the mucosa-associated  
390 community. It was previously reasoned that the mucosal environment may better reflect  
391 host genetic variation (Spor et al., 2011), and evidence for this hypothesis exists in nature  
392 (Linnenbrink et al., 2013). Finally, by cross-referencing our results with previous  
393 mapping studies and recently available proteomic data from germ-free versus  
394 conventional mice, we curated a more reliable list of candidate genes and pathways.  
395 Taken together, these results provide unique and unprecedented insight into the genetic  
396 basis for host-microbe interactions.

397 Importantly, by using wild-derived hybrid inbred strains to generate our mapping  
398 population, we gained insight into the evolutionary association between hosts and their  
399 microbiota at the transition from within species variation to between species divergence.  
400 Genetic relatedness in our mapping population significantly correlates with microbiome  
401 similarity, supporting a basis for codiversification at the early stages of speciation. A  
402 substantial proportion of microbial taxa are heritable, and heritability is correlated with  
403 cospeciation rates. This suggests that (i) vertical transmission could enable greater host  
404 adaptation to bacteria and/or (ii) the greater number of host genes associated with  
405 cospeciating taxa could indicate a greater dependency on the host, such that survival  
406 outside a specific host is reduced, making horizontal transmission less likely.

407 By performing 16S rRNA gene profiling at both the DNA and RNA level, we found  
408 that 30% (DNA-based) to 45% (RNA-based) of bacterial taxa are heritable, which is  
409 consistent with or higher than estimates reported in humans (~10%, Goodrich et al.,  
410 2016; ~21%, Turpin et al., 2016) and previous mouse studies (Kovacs et al., 2011; McKnite  
411 et al., 2012; Campbell et al., 2012; O'Connor et al., 2014; Carmody et al., 2015; Korach-  
412 Rechtman et al., 2019;). The high proportion of heritable taxa, with estimates of up to  
413 91%, is likely explained in part by several factors of our study design. First, mice were



414 raised in a controlled common environment, and heritability estimates in other  
415 mammals were shown to be contingent on the environment (Grieneisen et al., 2021).  
416 Further, bacterial communities were sampled from cecal tissue instead of fecal content  
417 (Linnenbrink et al., 2013), and genetic variation was higher than in a typical mapping  
418 study due to subspecies differences. For the RNA-based traits, heritability estimates  
419 were significantly correlated with previously reported cospeciation rates in mammals  
420 (Groussin et al., 2017). This pattern, as well as the higher proportion of heritable taxa in  
421 RNA-based traits, suggest that host genetic effects are more strongly reflected by  
422 bacterial activity than cell number.

423       Accordingly, we found a total of 179 and 313 unique significant loci for DNA-based  
424 and RNA-based bacterial abundance, respectively, passing the conservative study-wide  
425 significance threshold. Taxa had a median of five significant loci, suggesting a complex  
426 and polygenic genetic architecture affecting bacterial abundances. We identify a higher  
427 number of loci in comparison to previous QTL and GWAS studies in mice (Benson et al.,  
428 2010; McKnite et al., 2012; Leamy et al., 2014; Wang et al., 2015; Org et al., 2015; Snijders  
429 et al., 2016; Kemis et al., 2019), which may be due to a number of factors. The parental  
430 strains of our study were never subjected to rederivation and subsequent reconstitution  
431 of their microbiota, and natural mouse gut microbiota are more variable than the  
432 artificial microbiota of laboratory strains (Kohl and Dearing, 2014; Weldon et al., 2015;  
433 Suzuki, 2017; Rosshart et al., 2017;). Furthermore, as noted above, our mapping  
434 population harbors both within- and between-subspecies genetic variation. We crossed  
435 incipient species sharing a common ancestor ~ 0.5 million years ago, hence we may also  
436 capture the effects of mutations that fixed rapidly between subspecies due to strong  
437 selection, which are typically not variable within species (Walsh, 1998; Barton and  
438 Keightley, 2002).

439       Importantly, our results also help to describe general features of the genetic  
440 architecture of bacterial taxon activity. For the majority of loci, the allele associated with  
441 lower relative abundance of the bacterial taxon was (partially) dominant. This suggests  
442 there is strong purifying selection against a high abundance of any particular taxon,  
443 which may help ensure high alpha diversity. The heterozygotes of one-third of  
444 significant SNPs displayed transgressive phenotypes. This is consistent with previous  
445 studies of hybrids (Turner et al., 2012; Turner and Harr, 2014; Wang et al., 2015;), for  
446 example, wild-caught hybrids showed broadly transgressive gut microbiome  
447 phenotypes. This pattern can be explained by over- or underdominance, or by epistasis  
448 (Rieseberg et al., 1999).

449       Notably, many loci significantly associated with bacterial abundance in this study  
450 were implicated in previous studies (Fig. 5). For example, chromosome 2 169-171 Mb is  
451 associated with ASV23 (*Eisenbergiella*), *Eisenbergiella* and ASV32 (unclassified  
452 Lachnospiraceae) in this study, and overlaps with significant loci from three previous  
453 studies (Leamy et al., 2014; Snijders et al., 2016; Kemis et al., 2019). This region contains

454 eight protein-coding genes: *Gm11011*, *Znf217*, *Tshz2*, *Bcas1*, *Cyp24a1*, *Pfdn4*,  
455 *4930470P17Rik*, and *Dok5*. Another hotspot is on chromosome 5 101-103 Mb. This locus is  
456 significantly associated with four taxa in this study (Prevotellaceae, *Paraprevotella*, ASV7  
457 genus *Paraprevotella* and *Acetatifactor*) and overlaps with associations for Clostridiales,  
458 Clostridiaceae, Lachnospiraceae, and Deferribacteriaceae (Snijders et al., 2016). Protein-  
459 coding genes in this region are: *Nkx6-1*, *Cds1*, *Wdfy3*, *Arhgap24*, and *Mapk10*. As previous  
460 studies were based on rederived mouse strains, identifying significant overlap in the  
461 identification of host loci suggests that some of the same genes and/or mechanisms  
462 influencing major members of gut microbial communities are conserved even in the face  
463 of community 'reset' in the context of re-derivation. The identity of the taxa is however  
464 not always the same, which suggests that functional redundancy may contribute to  
465 these observations, if e.g. several bacterial taxa fulfill the same function within the gut  
466 microbiome (Moya and Ferrer, 2016; Tian et al., 2020). Additionally, there is significant  
467 overlap of genes within loci identified in the current study and proteins differentially  
468 expressed in the intestine of germ-free mice compared to conventionally raised mice  
469 (Mills et al., 2020). Finally, by analyzing the functions of the genes closest to significant  
470 SNPs, we found that 12 of the 14 significantly enriched KEGG pathways were shown to  
471 be related to interactions with bacteria (Fonken et al., 2010; Thaïss et al., 2014; Neumann  
472 et al., 2014; Thaïss et al., 2015a; Thaïss et al., 2015b; Castoldi et al., 2015; Erdman and  
473 Poutahidis, 2016; Thaïss et al., 2016; Deaver et al., 2018; Wu et al., 2018; Peng et al., 2020;  
474 Nagpal et al., 2020; Hollander and Kaunitz, 2020; Suppl. Table 5).

475 To improve the robustness of our results, we combined multiple lines of evidence to  
476 prioritize candidates, resulting in a network of 80 genes (Suppl. Table 7). At the center of  
477 this network is a set of 22 proteins involved in G-protein coupled receptor signaling (Fig.  
478 6, red nodes). MCHR1, NMUR2, and TACR3 (Fig. 6, yellow) are known to regulate  
479 feeding behavior (Saito et al., 1999; Cardoso et al., 2012; Smith et al., 2019), and CHRM3  
480 to control digestion (Gautam et al., 2006; Tanahashi et al., 2009). Gut microbes can  
481 produce GPCR agonists to elicit host cellular responses (Cohen et al., 2017; Colosimo et  
482 al., 2019; Chen et al., 2019; Pandey et al., 2019). Thus, GPCRs may be key modulators of  
483 communication between the gut microbiota and host. Another interesting group of  
484 genes are those responding to nutrient levels (*Bmp7*, *Cd40*, *Aacs*, *Gclc*, *Nmur2*, *Cyp24a1*,  
485 *Adcyap1*, *Serpinc1*, and *Wnt11*) (Sethi and Vidal-Puig, 2008; Peier et al., 2009; Townsend et  
486 al., 2012; Yi and Bishop, 2015; Shi and Tu, 2015; Toderici et al., 2016; Yasuda et al., 2021;  
487 Gastelum et al., 2021;), as gut microbiota affect host nutrient uptake (Chung et al., 2018).  
488 In addition, CYP24A1, BMP7 and CD40 respond to vitamin D. Previous studies  
489 identified vitamin D/the vitamin D receptor to play a role in modulating the gut  
490 microbiota (Wang et al., 2016; Malaguarnera, 2020; Yang et al., 2020b; Singh et al., 2020),  
491 and CD40 is known to induce a vitamin D dependent antimicrobial response through  
492 IFN- $\gamma$  activation (Klug-Micu et al., 2013).

493 Another important category of candidate genes are those involved in immunity.  
494 Our most significant SNP was situated downstream of the *Tlr4* gene and was associated  
495 with the genus *Dorea* and several *Dorea* species. *Dorea* is a known short chain fatty acid  
496 producer (Taras et al., 2002; Reichardt et al., 2018) and interacts with tight junction  
497 proteins *Claudin-2* and *Occludin* (Alhasson et al., 2017). *Tlr4* is a member of the Toll-like  
498 receptor family, and has been linked with obesity, inflammation, and changes in the gut  
499 microbiota (Velloso et al., 2015). These combined results reflect an important role for  
500 *Dorea* in fatty acid harvesting and intestinal barrier integrity, both of which could act  
501 systemically to activate TLR4 and to promote metabolic inflammation (Cani et al., 2008;  
502 Delzenne et al., 2011; Nicholson et al., 2012). Moreover, the SNP with the second lowest  
503 *P* value was associated with the same taxa and situated 181 kb upstream of *Irak4*. IRAK4  
504 is rapidly recruited after TLR4 activation to enable downstream activation of the NFκB  
505 immune pathway. *Irak4* has previously been associated with a change in bacterial  
506 abundance using inbred mice (McKnite et al., 2012; Org et al., 2015).

507 Finally, we identified notable links between candidate genes and five human  
508 diseases (mental disorders, blood pressure finding, systemic arterial pressure, substance-  
509 related disorders, and atrial septal deficits; Suppl. Fig. 10). The connection to mental  
510 disorders is intriguing as involvement of the gut microbiota is suspected (Kelly et al.,  
511 2015; Foster et al., 2017; Cox and Weiner, 2018; Chen et al., 2019; Sarkar et al., 2020;  
512 Parker et al., 2020; Flux and Lowry, 2020). Taken together with our finding of an  
513 enriched set of GPCRs, this highlights the importance of host-microbial interplay along  
514 the gut-brain axis. Moreover, we also identify a significant over-representation of IBD  
515 genes (Khan et al., 2021) among the 925 genes nearest to significant SNPs (Suppl. Table  
516 6). Interestingly, SNPs in five out of 14 genes are associated with ASVs belonging to the  
517 genus *Oscillibacter*, a highly cospeciating taxon known to decrease during the active state  
518 of IBD (Metwaly et al., 2020).

519 In summary, our study provides a number of novel insights into the importance of  
520 host genetic variation in shaping the gut microbiome, in particular for cospeciating  
521 bacterial taxa. These findings provide an exciting foundation for future studies of the  
522 precise mechanisms underlying host-gut microbiota interactions in the mammalian gut  
523 and should encourage future genetic mapping studies that extend analyses to the  
524 functional metagenomic sequence level.

## 525 **Materials and Methods**

### 526 *Intercross design*

527 We generated a mapping population using partially inbred strains derived from  
528 mice captured in the *M. m. musculus* - *M. m. domesticus* hybrid zone around Freising,  
529 Germany in 2008 (Turner et al., 2012). Originally, four breeding stocks were derived  
530 from 8-9 ancestors captured from one (FS, HA, TU) or two sampling sites (HO), and  
531 maintained with four breeding pairs per generation using the HAN-rotation out-  
532 breeding scheme (Rapp, 1972). Eight inbred lines (two per breeding stock) were  
533 generated by brother/sister mating of the 8th generation lab-bred mice. We set up the  
534 cross when lines were at the 5th-9th generation of brother-sister meeting, with  
535 inbreeding coefficients of > 82%.

536 We first set up eight G1 crosses, each with one predominantly *domesticus* line (FS,  
537 HO - hybrid index <50%; see below) and one predominantly *musculus* line (HA, TU -  
538 hybrid index >50%); each line was represented as a dam in one cross and sire in another  
539 (Suppl. Fig. 14). One line, FS5, had a higher hybrid index than expected, suggesting  
540 there was a misidentification during breeding (see genotyping below). Next, we set up  
541 G2 crosses in eight combinations (subcrosses), such that each G2 individual has one  
542 grandparent from each of the initial four breeding stocks. We included 40 males from  
543 each subcross in the mapping population.

544 This study was performed according to approved animal protocols and in-  
545 stitutional guidelines of the Max Planck Institute. Mice were maintained and handled in  
546 accordance with FELASA guidelines and German animal welfare law (Tierschutzgesetz  
547 § 11, permit from Veterinäramt Kreis Plön: 1401-144/PLÖ-004697).

### 548 *Sample collection*

549 Mice were sacrificed at  $91 \pm 5$  days by CO<sub>2</sub> asphyxiation. We recorded body weight,  
550 body length and tail length, and collected ear tissue for genotyping. The caecum was  
551 removed and gently separated from its contents through bisection and immersion in  
552 RNAlater (Thermo Fisher Scientific, Schwerte, Germany). After overnight storage in  
553 RNAlater at 4° C, the RNAlater was removed and tissue stored at -20° C.

### 554 *DNA extraction and sequencing*

555 We simultaneously extracted DNA and RNA from caecum tissue samples using  
556 Qiagen (Hilden, Germany) Allprep DNA/RNA 96-well kits. We followed the  
557 manufacturer's protocol, with the addition of an initial bead beating step using Lysing  
558 matrix E tubes (MP Biomedical, Eschwege) to increase cell lysis. We used caecum tissue  
559 because host genetics has a greater influence on the microbiota at this mucosal site than  
560 on the lumen contents (Linnenbrink et al., 2013). We performed reverse transcription of  
561 RNA with High-Capacity cDNA Transcription Kits from Applied Biosystems  
562 (Darmstadt, Germany). We amplified the V1-V2 hypervariable region of the 16S rRNA

563 gene using barcoded primers (27F-338R) with fused MiSeq adapters and heterogeneity  
564 spacers following (Rausch et al., 2016) and sequenced amplicons with 250 bp paired-  
565 reads on the Illumina MiSeq platform.

#### 566 *16S rRNA gene analysis*

567 We assigned sequences to samples by exact matches of MID (multiplex identifier, 10  
568 nt) sequences processed 16S rRNA sequences using the DADA2 pipeline, implemented  
569 in the DADA2 R package, version 1.16.0 (Callahan et al., 2016; Callahan, 2016). Briefly,  
570 raw sequences were trimmed and quality filtered with the maximum two 'expected  
571 errors' allowed in a read, paired sequences were merged and chimeras removed. For all  
572 downstream analyses, we rarefied samples to 10,000 reads each. Due to the quality  
573 filtering, we have phenotyping data for 286 individuals on DNA level, and 320 G2  
574 individuals on RNA level. We classified taxonomy using the Ribosomal Database Project  
575 (RDP) training set 16 (Cole et al., 2014). Classifications with low confidence at the genus  
576 level (<0.8) were grouped in the arbitrary taxon 'unclassified\_group'.

577 We used the phyloseq R package (version 1.32.0) to estimate alpha diversity using  
578 the Shannon index and Chao1 index, and beta diversity using Bray-Curtis distance  
579 (McMurdie and Holmes, 2013). We defined core microbiomes at the DNA- and RNA-  
580 level, including taxa present in > 25% of the samples and with median abundance of  
581 non-zero values > 0.2% for amplicon sequence variant (ASV) and genus; and >0.5% for  
582 family, order, class and phylum.

#### 583 *Genotyping*

584 We extracted genomic DNA from ear samples using Qiagen Blood and Tissue 96  
585 well kits (Hilden, Germany), according to the manufacturer's protocol. We sent DNA  
586 samples from 26 G0 mice and 320 G2 mice to GeneSeek (Neogen, Lincoln, NE) for  
587 genotyping using the Giga Mouse Universal Genotyping Array (GigaMUGA; Morgan et  
588 al., 2015), an Illumina Infinium II array containing 141,090 single nucleotide  
589 polymorphism (SNP) probes. We quality-filtered genotype data using plink 1.9 (Chang  
590 et al., 2015); we removed individuals with call rates <90% and SNPs that were: not bi-  
591 allelic, missing in >10% individuals, with minor allele frequency <5%, or Hardy-  
592 Weinberg equilibrium exact test  $P$  values <1e-10. A total of 64,103 SNPs and all but one  
593 G2 individual were retained. Prior to mapping, we LD-filtered SNPs with  $r^2 > 0.9$  using a  
594 window of 5 SNPs and a step size of 1 SNP. We retain 32,625 SNPs for mapping.

#### 595 *Hybrid index calculation*

596 For each G0 and G2 mouse, we estimated a hybrid index – defined as the  
597 percentage of *M. m. musculus* ancestry. We identified ancestry-informative SNP markers  
598 by comparing GigaMUGA data from ten individuals each from two wild-derived  
599 outbred stocks of *M. m. musculus* (Kazakhstan and Czech Republic) and two of *M. m.*  
600 *domesticus* (Germany and France) maintained at the Max Planck Institute for

601 Evolutionary Biology (L.M. Turner and B. Payseur, unpublished data). We classified  
602 SNPs as ancestry informative if they had a minimum of 10 calls per subspecies, the  
603 major allele differed between *musculus* and *domesticus*, and the allele frequency  
604 difference between subspecies was  $> 0.3$ . A total of 48,361 quality-filtered SNPs from the  
605 G0/G2 genotype data were informative, including 8,775 SNPs with fixed differences  
606 between subspecies samples.

#### 607 *Correlation between host relatedness and microbiome structure*

608 To investigate if host relatedness is correlated with individual variation in  
609 microbiome composition, we computed a centered relatedness matrix using the 32,625  
610 filtered SNPs with GEMMA (v 0.98.1; Zhou and Stephens, 2012) and microbial  
611 composition-based kinship matrix among individuals based on relative bacterial  
612 abundances (Chen et al., 2018). The kinship matrix was calculated with the formula:

$$Kinship = 1/p \sum_{i=1}^p (x_i - 1_n \bar{x}_i)(x_i - 1_n \bar{x}_i)^T$$

613 where  $X$  denotes the  $n \times p$  matrix of genotypes or relative abundances,  $x_i$  as its  $i$ th  
614 column representing the genotypes of  $i$ th SNP or the relative abundance of the  $i$ th ASV,  
615  $\bar{x}_i$  as the sample mean and  $1_n$  as a  $n \times 1$  vector of 1's. We used a Mantel test with the  
616 Spearman's correlation to test for correlation between the host SNP-based kinship and  
617 microbial composition-based kinship using 10,000 permutations.

#### 618 *SNP-based heritability of microbial abundances*

619 We calculated SNP-based heritabilities for bacterial abundances using a linear  
620 mixed model implemented in the lme4qtl R package (version 0.2.2; Ziyatdinov et al.,  
621 2018). The SNP-based heritability is expressed as:

$$h^2 = \frac{\sigma_g^2}{\sigma_g^2 + \sigma_m^2 + \sigma_e^2}$$

622 where  $\sigma_g^2$  is the genetic variance estimated by  $K_{SNP}$ ,  $\sigma_m^2$  variance of the mating pair  
623 component, and  $\sigma_e^2$  the variance due to residual environmental factors. We determined  
624 significance of the heritability estimates using exact likelihood ratio tests, following  
625 Supplementary Note 3 in Ziyatdinov et al., 2018, using the exactLRT() function of the R  
626 package RLRsim (version 3.1-6; Fabian et al., 2008).

#### 627 *Genome-wide association mapping*

628 Prior to mapping, we inverse logistic transformed bacterial abundances using the  
629 inv.logit function from the R package gtools (version 3.9.2; Gregory R. Warnes, 2020).

630 We performed association mapping in the R package lme4qtl (version 0.2.2;  
631 Ziyatdinov et al., 2018) with the following linear mixed model:

$$y_i = \mu + a_i X_{ij}^a + d_i X_{ij}^d + Wu + e$$

632

633 where  $y_j$  is the phenotypic value of the  $j$ th individual;  $\mu$  is the mean,  $X_{nij}$  the additive  
634 and  $X_{dij}$  the dominance genotypic index values coded as for individual  $j$  at locus  $i$ .  $a$  and  
635  $d$  indicate fixed additive and dominance effects,  $W$  indicates random effects mating pair  
636 and kinship matrix, plus residual error  $e$ .

637 We estimated additive and dominance effects separately because we expected to  
638 observe underdominance and overdominance in our hybrid mapping population, as  
639 well as additive effects, and aimed to estimate their relative importance. To model the  
640 additive effect (i.e. 1/2 distance between homozygous means), genotypes at each locus,  
641  $i$ , were assigned additive index values ( $X^a \in 1, 0, -1$ ) for AA, AB, BB, respectively, with A  
642 indicating the major allele and B the minor allele. To model dominance effects (i.e.  
643 heterozygote mean - midpoint of homozygote means), genotypes were assigned  
644 dominance index values ( $X^d \in 0, 1$ ) for homozygotes and heterozygotes, respectively.

645 We included mating pair as a random effect to account for maternal effects and cage  
646 effects, as male litter mates are kept together in a cage after weaning. We included  
647 kinship coefficient as a random effect in the model to account for population and family  
648 structure. To avoid proximal contamination, we used a leave-one-chromosome-out  
649 approach, that is, when testing each single-SNP association we used a relatedness matrix  
650 omitting markers from the same chromosome (Parker et al., 2014). Hence, for testing  
651 SNPs on each chromosome, we calculated a centered relatedness matrix using SNPs  
652 from all other chromosomes with GEMMA (v0.97; Zhou and Stephens, 2012). We  
653 calculated  $P$  values for single-SNP associations by comparing the full model to a null  
654 model excluding fixed effects. Code for performing the mapping is available at [https://](https://github.com/sdoms/mapping_scripts)  
655 [github.com/sdoms/mapping\\_scripts](https://github.com/sdoms/mapping_scripts).

656 We evaluated significance of SNP-trait associations using two thresholds; first, we  
657 used a genome-wide threshold for each trait, where we corrected for multiple testing  
658 across markers using the Bonferroni method (Abdi, 2007). Second, as bacteria interact  
659 with each other within the gut as members of a community, bacterial abundances are  
660 non-independent, so we calculated a study-wide threshold dividing the genome-wide  
661 threshold by the number of effective taxa included. We used matSpDlite (Nyholt, 2019;  
662 Li and Ji, 2005; Qin et al., 2020) to estimate the number of effective bacterial taxa based  
663 on eigenvalue variance.

664 To estimate the genomic interval represented by each significant LD-filtered SNP,  
665 we report significant regions defined by the most distant flanking SNPs in the full pre-  
666 LD-filtered genotype dataset showing  $r^2 > 0.9$  with each significant SNP. We combined  
667 significant regions less than 10 Mb apart into a single region. Genes situated in

668 significant regions were retrieved using biomaRt (Steffen Durinck, 2009), and the mm10  
669 mouse genome.

#### 670 *Dominance analyses*

671 We classified dominance for SNPs with significant associations on the basis of the  
672  $d/a$  ratio (Falconer, 1996) where  $d$  is the dominance effect,  $a$  the additive effect. As the  
673 expected value under purely additive effects is 0. As our mapping population is a multi-  
674 parental-line cross, and not all SNPs were ancestry-informative with respect to *musculus/*  
675 *domesticus*, the sign of  $a$  effects is defined by the major allele within our mapping  
676 population, which lacks clear biological interpretation. To provide more meaningful  
677 values, we report  $d/|a|$ , such that a value of 1 = complete dominance of the allele  
678 associated with higher bacterial abundance, and a value of -1 = complete dominance of  
679 the allele associated with lower bacterial abundance. Values above 1 or below -1 indicate  
680 over/underdominance. We classified effects of significant regions the following  
681 arbitrary  $d/|a|$  ranges to classify dominance of significant regions (Burke et al., 2002;  
682 Miller et al., 2014): underdominant  $<-1.25$ , high abundance allele recessive between -1.25  
683 and -0.75, partially recessive between -0.75 and -0.25, additive between -0.25 and 0.25,  
684 partially dominant between 0.25 and 0.75, dominant 0.75 and 1.25, and  
685 overdominant  $>1.25$ .

#### 686 *Gene ontology and network analysis*

687 The nearest genes up- and downstream of the significant SNPs were identified  
688 using the locateVariants() function from the VariantAnnotation R package (version  
689 1.34.0; Valerie et al., 2014) using the default parameters. A maximum of two genes per  
690 locus were included (one upstream, and one downstream of a given SNP).

691 To investigate functions and interactions of candidate genes, we calculated a  
692 protein-protein interaction (PPI) network with STRING version 11 (Szklarczyk et al.,  
693 2019), on the basis of a list of the closest genes to all SNPs with significant trait  
694 associations. We included network edges with an interaction score  $>0.9$ , based on  
695 evidence from fusion, neighborhood, co-occurrence, experimental, text-mining,  
696 database, and co-expression. We exported this network to Cytoscape v 3.8.2 (Shannon et  
697 al., 2003) for identification of highly interconnected regions using the MCODE  
698 Cytoscape plugin (Bader and Hogue, 2003), and functional annotation of clusters using  
699 the stringApp Cytoscape plugin (Doncheva et al., 2019).

700 We identified overrepresented KEGG pathways and human diseases using the  
701 clusterProfiler R package (version 3.16.1; Yu et al., 2012).  $P$  values were corrected for  
702 multiple testing using the Benjamini-Hochberg method. Pathways and diseases with an  
703 adjusted  $P$  value  $< .05$  were considered over-represented.



**704** *Calculating overlap with other studies and over-representation of IBD genes*

**705** To test for significant overlap with loci identified in previous mapping studies and  
**706** for over-representation of IBD genes, we used the tool *poverlap* (Brent Pedersen, 2013) to  
**707** compare observed overlap to random expectations based on 10,000 permutations of  
**708** significant regions. We identified genes within overlapping regions using the  
**709** `locateVariants()` function from the VariantAnnotation R package (version 1.34.0; Valerie  
**710** et al., 2014).

**711** *Combination of results*

**712** Hub genes SNP network and their first neighbors, the hub genes from the  
**713** ‘differentially expressed in GF mice’-network and their respective first neighbors, genes  
**714** found in both Mills et al. (2020) and other mouse QTL studies, closest genes to a SNP  
**715** found in Mills et al. (2020), genes situated in the 20 smallest intervals, six genes in the  
**716** two intervals with the lowest *P* values, twenty genes in intervals found in most different  
**717** taxa, genes situated in the region with most overlap within our study, and finally the  
**718** genes situated in the intervals that most frequently overlapped with other studies were  
**719** combined into one gene set and analyzed with STRING. Genes situated in the same  
**720** genomic locus were curated according to the number of edges in the STRING network.

**721** **Data and code availability:** DNA- and RNA-based 16S rRNA gene sequences are  
**722** available under project accession number PRJNA759194. Code is available at [https://](https://github.com/sdoms/mapping_scripts)  
**723** [/github.com/sdoms/mapping\\_scripts](https://github.com/sdoms/mapping_scripts).

**724** **Supplementary Materials:** Suppl. Fig 1-14, Suppl. Table 1: Heritability estimates,  
**725** Suppl. Table 2: Genome-wide significant associations, Suppl. Table 3: Study-wide  
**726** significant associations, Suppl. Table 4: Intervals smaller than 1Mb, Suppl. Table 5:  
**727** Over-represented KEGG pathways, Suppl. Table 6: IBD genes, Suppl. Table 7:  
**728** Candidate genes.

**729** **Acknowledgments:** We thank Diethard Tautz for generous support of mouse  
**730** breeding and Camilo Medina and the MPI-Plön mouse team for performing mouse  
**731** husbandry, and Katja Cloppenburg-Schmidt and Dr. Sven Künzel for their excellent  
**732** technical assistance. We thank Mathieu Groussin for assistance with cospeciation rate  
**733** data. Research funding for this project was provided by the Deutsche  
**734** Forschungsgemeinschaft Collaborative Research Center 1182, ‘Origin and Function of  
**735** Metaorganisms’ (J.F.B. and A.F.) and TU 500/2-1 to L.M.T, and by the Max Planck  
**736** Society (to D. Tautz).

**737** **Author contributions:** Conceptualization: L.M.T., S.I., A.F., and J.F.B; Methodology:  
**738** L.M.T, J.F.B., S.D., S.I., A.F., and A.K.; Software: S.D., M.R., and L.M.T; Validation: S.D.,  
**739** M.R., A.K., and L.M.T.; Formal Analysis: S.D., M.R., A.K., and L.M.T; Investigation: S.D.  
**740** and L.M.T.; Resources: S.D., H.F., and C.C; Writing - Original Draft: S.D.; Writing -

**741** Review & Editing: S.D., L.M.T, and J.F.B; Visualization: S.D. and L.M.T; Supervision:  
**742** L.M.T, A.F, and J.F.B.; Project Administration: J.F.B.; Funding Acquisition: A.F, L.M.T,  
**743** and J.F.B.

**744** **Conflicts of Interest: The authors declare no conflict of interest.**

## 745 Supplementary figures

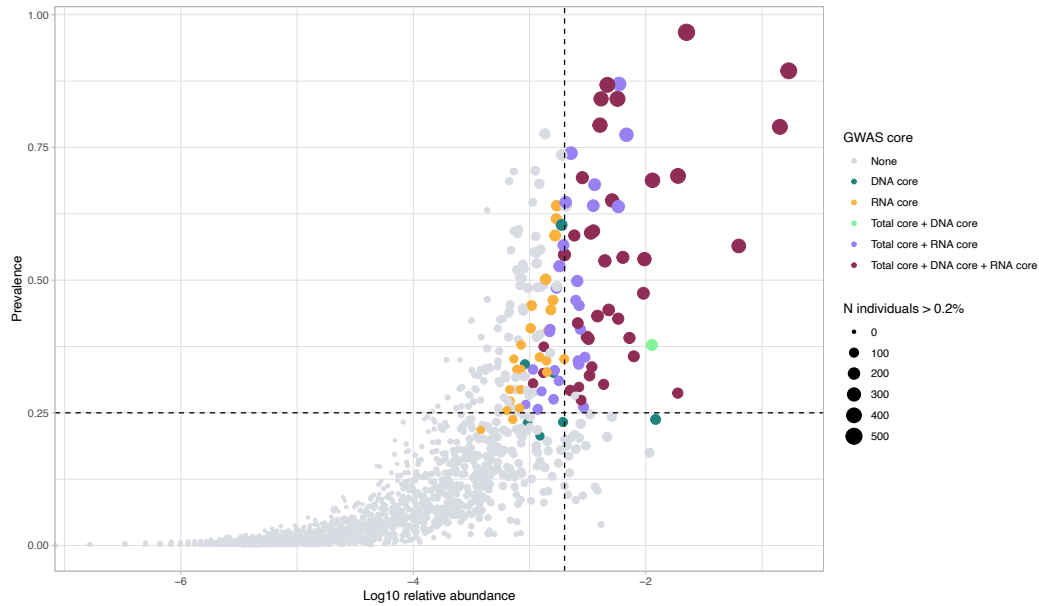

746 **Supplementary figure 1:** Selection of taxa for mGWAS analysis. A scatter plot showing the  
747 association of average relative abundance of taxa with their prevalence in the G2 mapping  
748 population. Taxa retained for analysis are colored according to the originating core. The size of  
749 each dot represents the number of individuals that have a median abundance higher than 0.2% of  
750 the taxon. The dashed lines represent the thresholds of the core (vertical: median abundance > 0.2%  
751 and horizontal prevalence of 25 %).

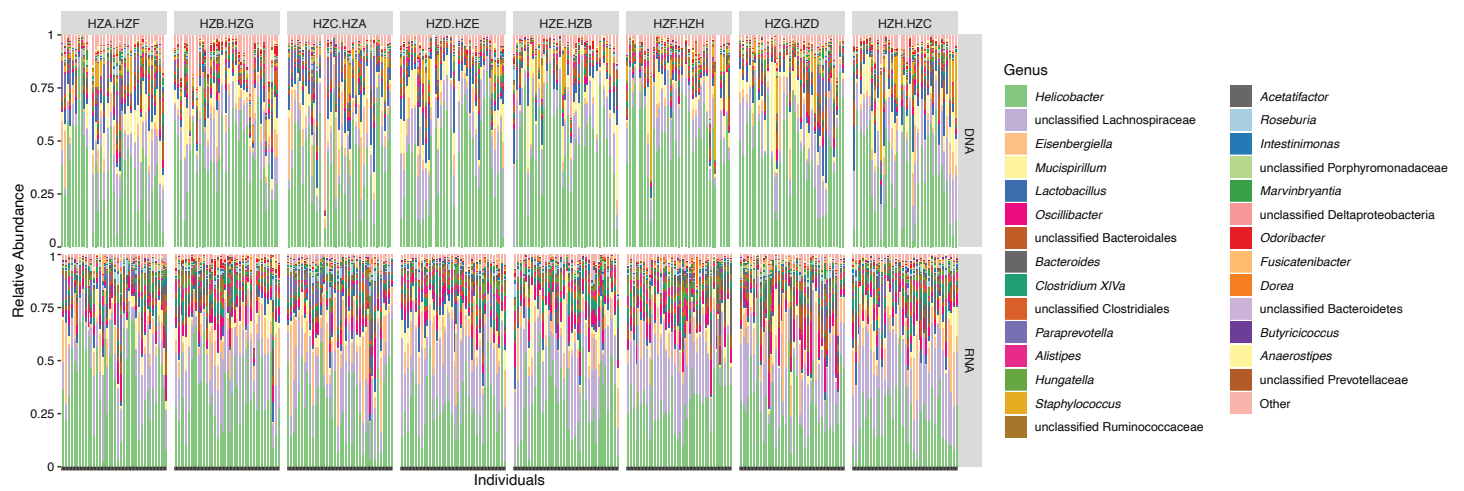

**752**            **Supplementary figure 2: Relative abundances of core genera in G2 mapping population.**

**753**            Each vertical line represents one individual. Subcross (see supplementary figure 14) is indicated at

**754**            the top.

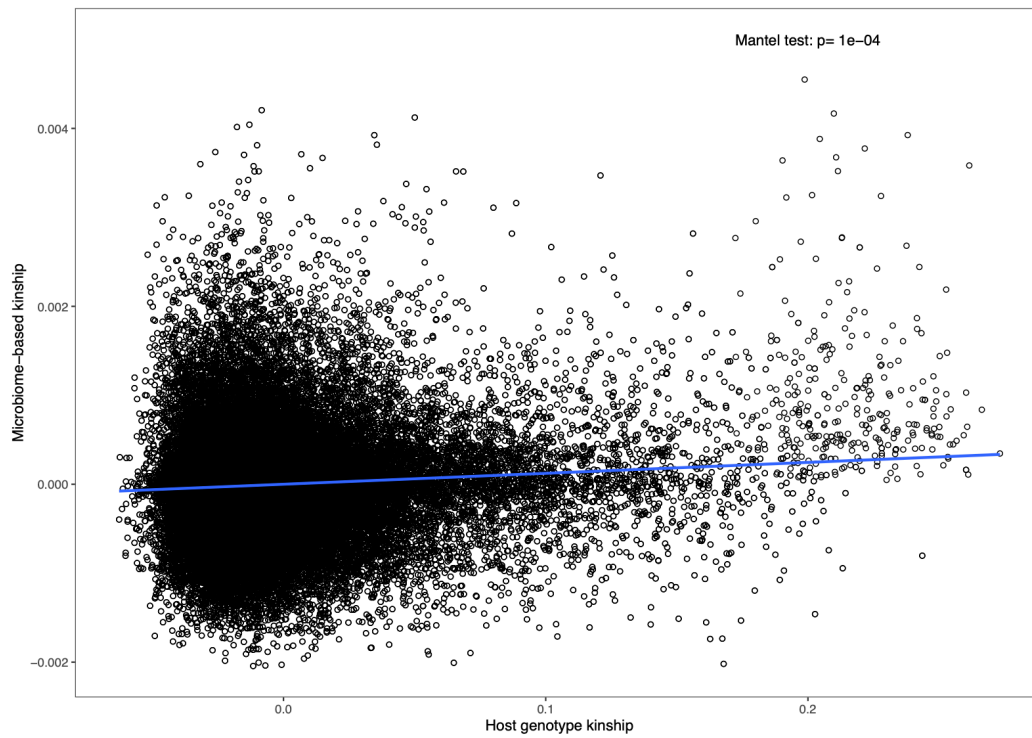

755  
756  
757

**Supplementary figure 3:** Host genetic relatedness calculated from SNP data (x-axis) correlated with microbial composition-based relatedness (y-axis) calculated from ASV abundances. The blue line represents a linear regression fit to the data.

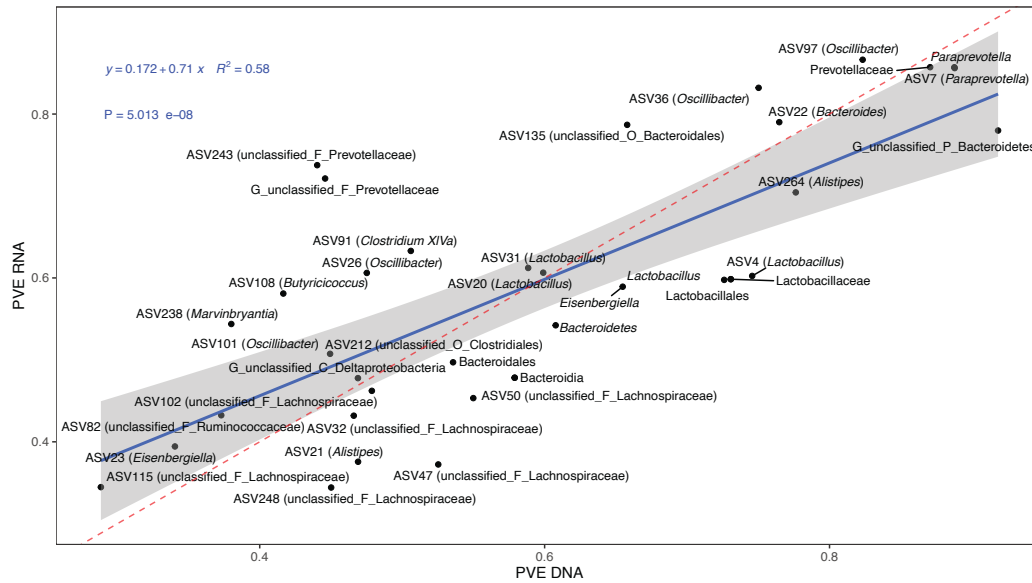

758  
759  
760

**Supplementary figure 4:** Correlation of SNP-based heritability estimates based on DNA (x-axis) or RNA (y-axis). The blue line represents a linear regression fit to the data. Red dashed line represents the identity line with a slope of 1.

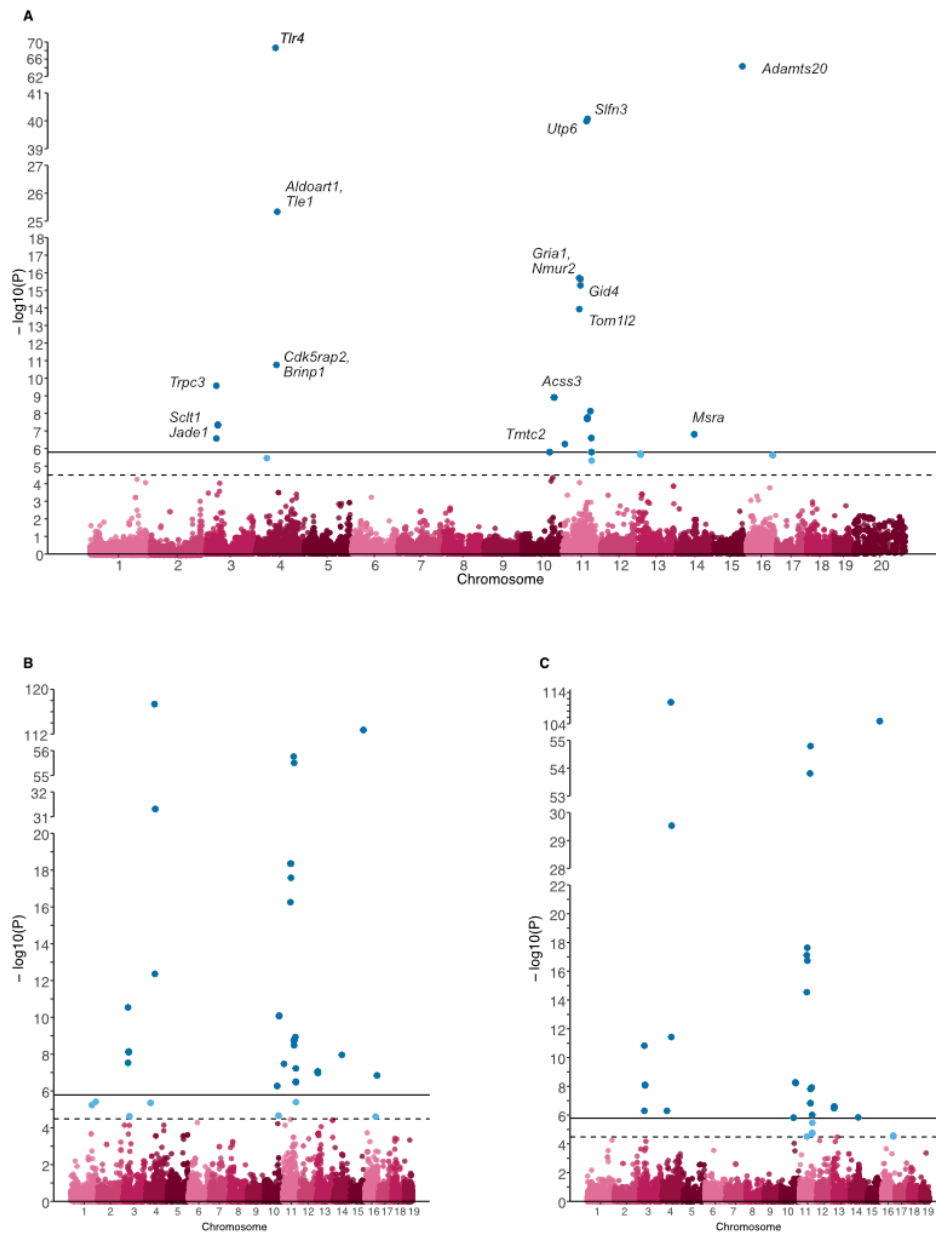

761  
762  
763  
764  
765

**Supplementary figure 5:** Manhattan plots for ASV184 (*Dorea*) of the complete model (A), the additive effect (B) or the dominance effect (C). SNPs passing the study-wide significance threshold (solid line) are shown in dark blue, while genome-wide significant SNPs (dashed line) are shown in light blue. In panel A, the closest gene to the SNP is shown for a subset of significant SNPs.

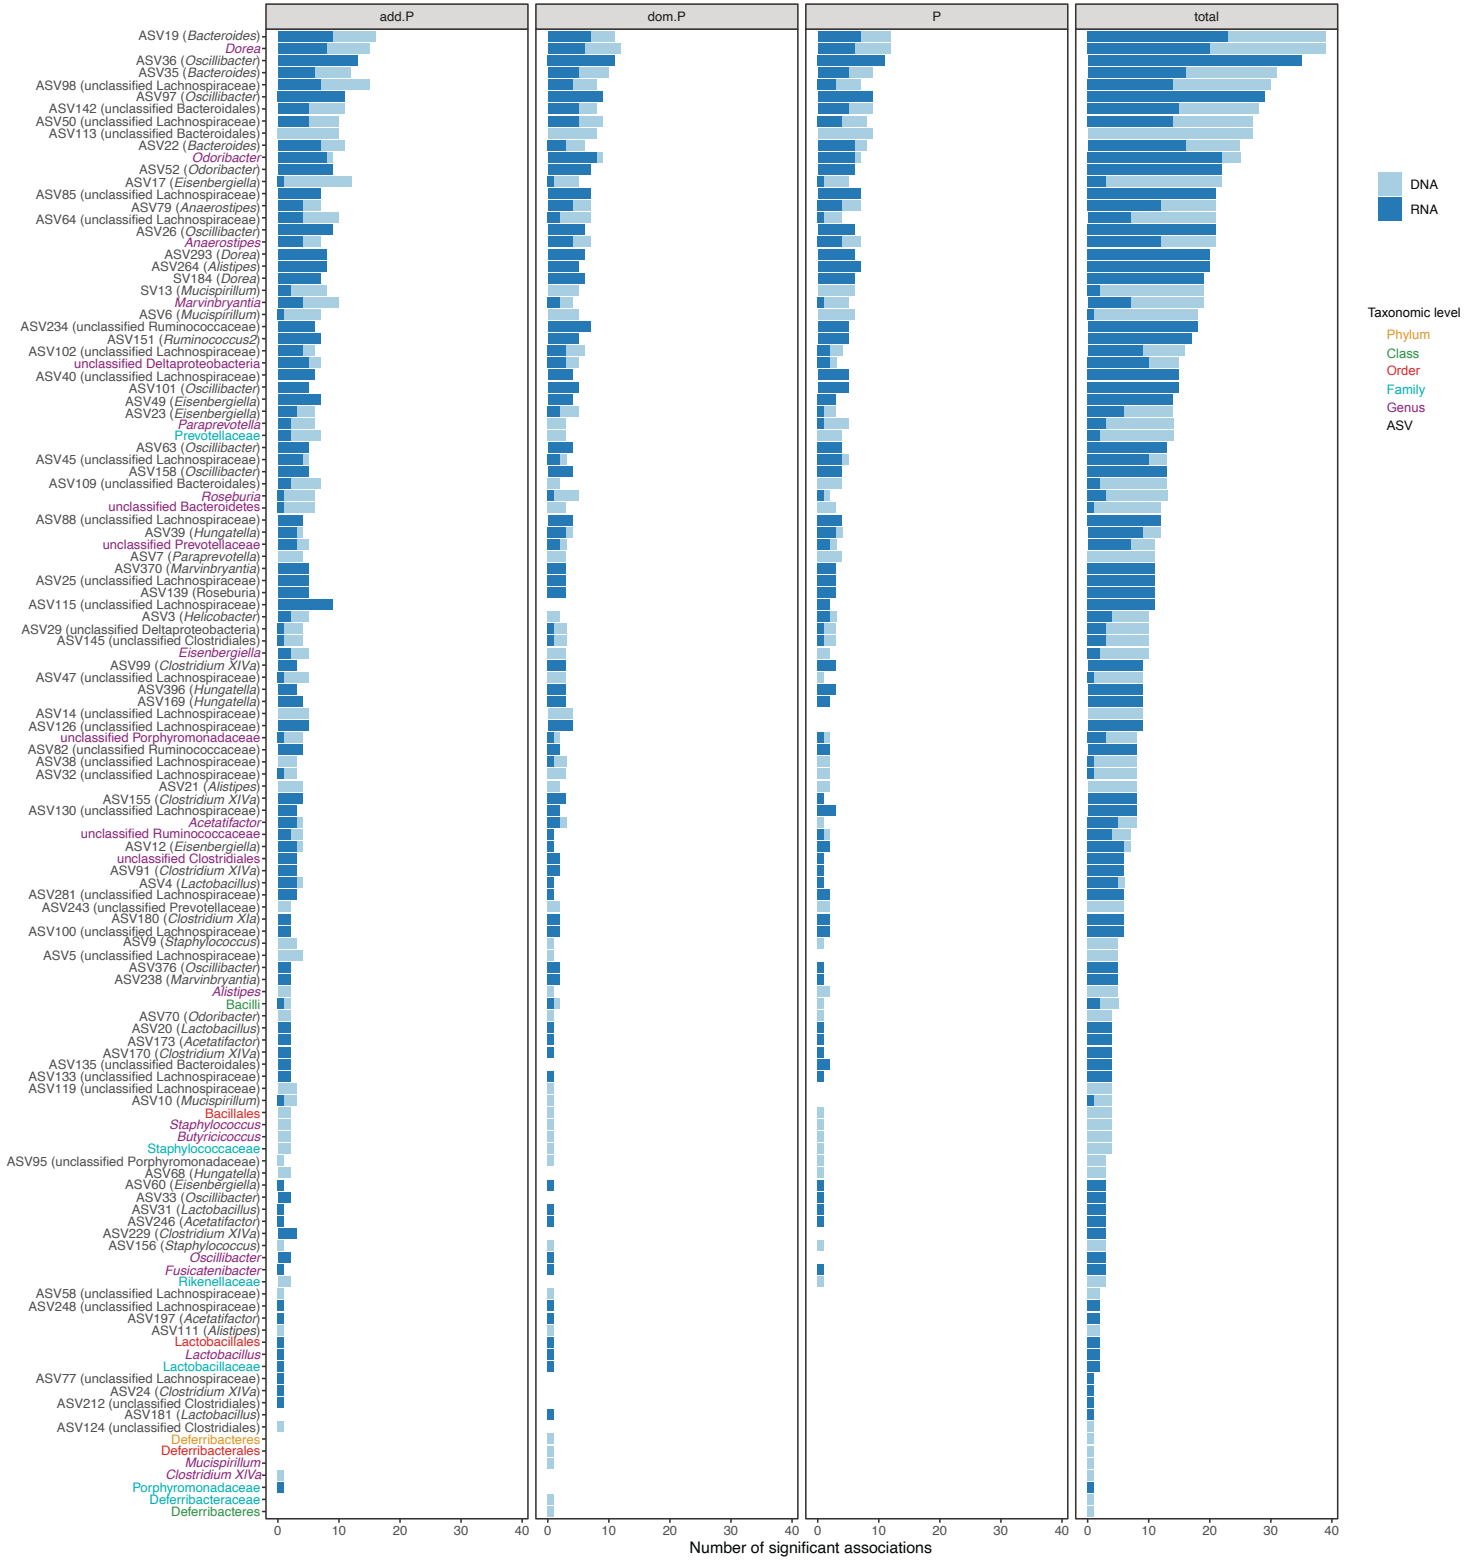

766  
767  
768

**Supplementary figure 6:** Number of significantly associated loci per bacterial taxon. Loci with significant additive effects (add.P), dominance effects (dom.P) or effects in full model (P) are indicated.



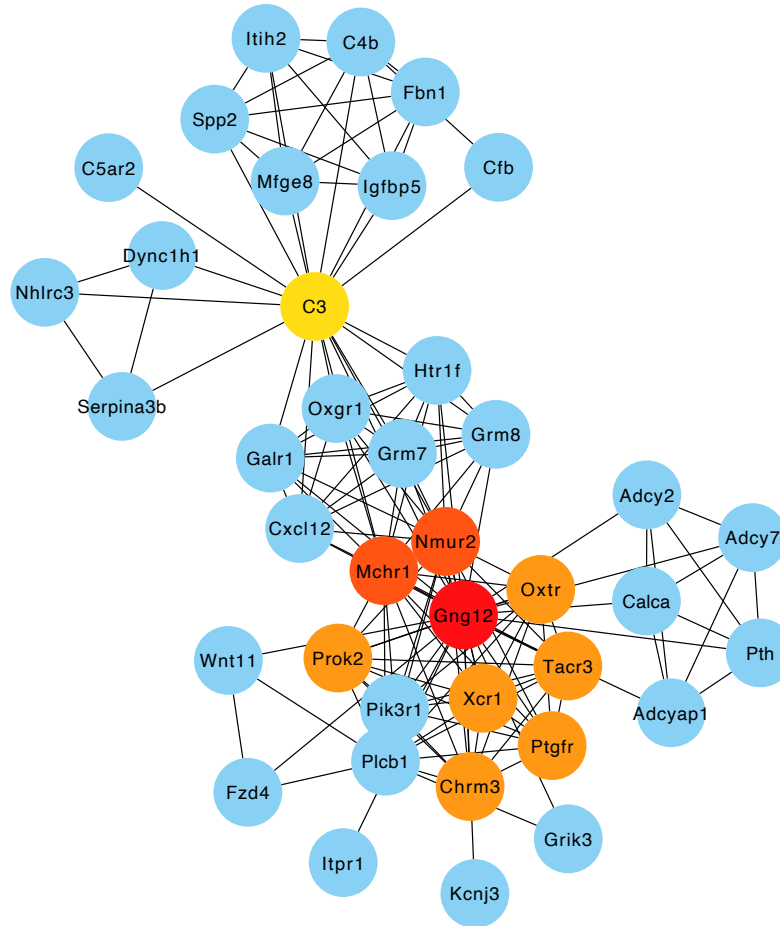

769

770

771

772

773

**Supplementary figure 7:** Top ten hub genes of the protein-protein interaction (PPI) network with the closest genes to the host SNPs significantly associated with bacterial abundances. The nodes are colored according to hub gene rank from 1 (red) to 10 (yellow). Blue nodes are the first neighbors.

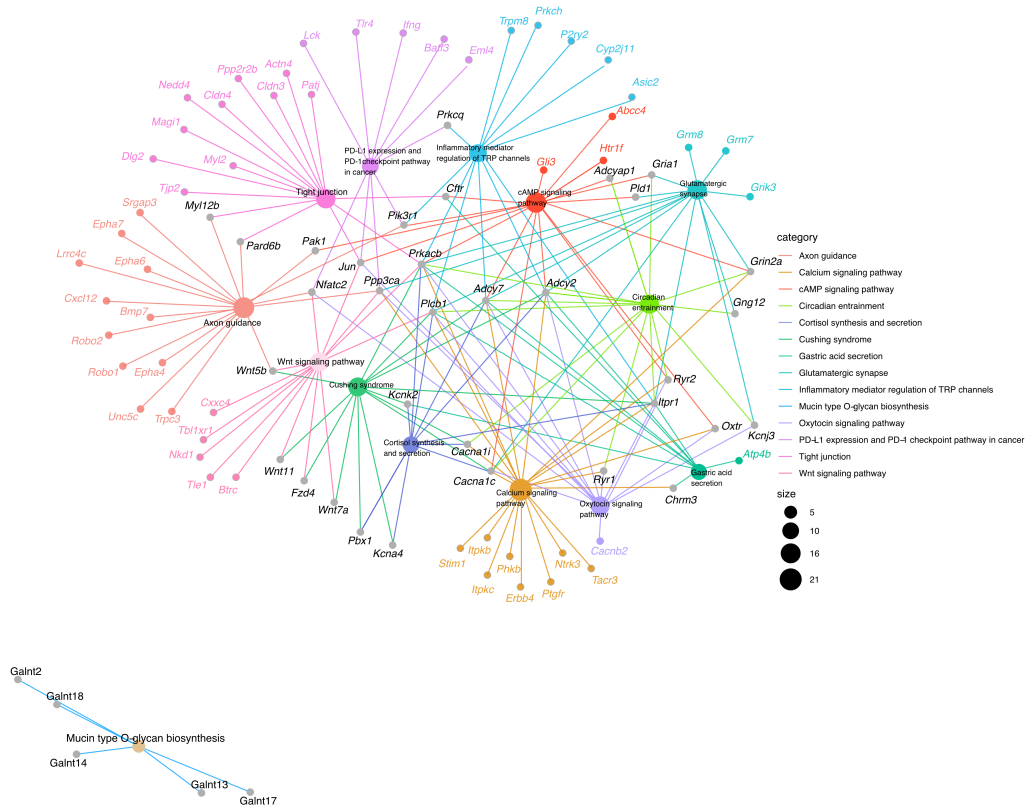

774  
775

**Supplementary figure 8:** Genes belonging to over-represented KEGG pathways within the host genes closest to significant SNPs from association analysis.

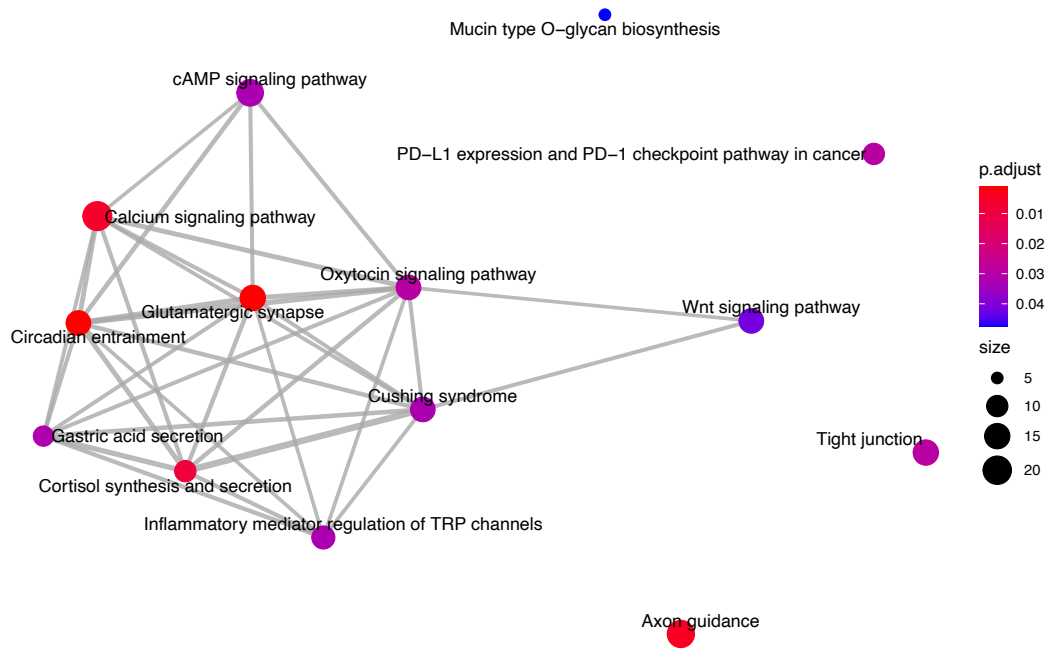

**776** **Supplementary figure 9:** Enriched KEGG pathways among closest genes to significant SNPs from  
**777** association analysis. Node color indicates FDR-adjusted  $P$  value of enrichment and node size indi-  
**778** cates number of candidate genes in pathway.

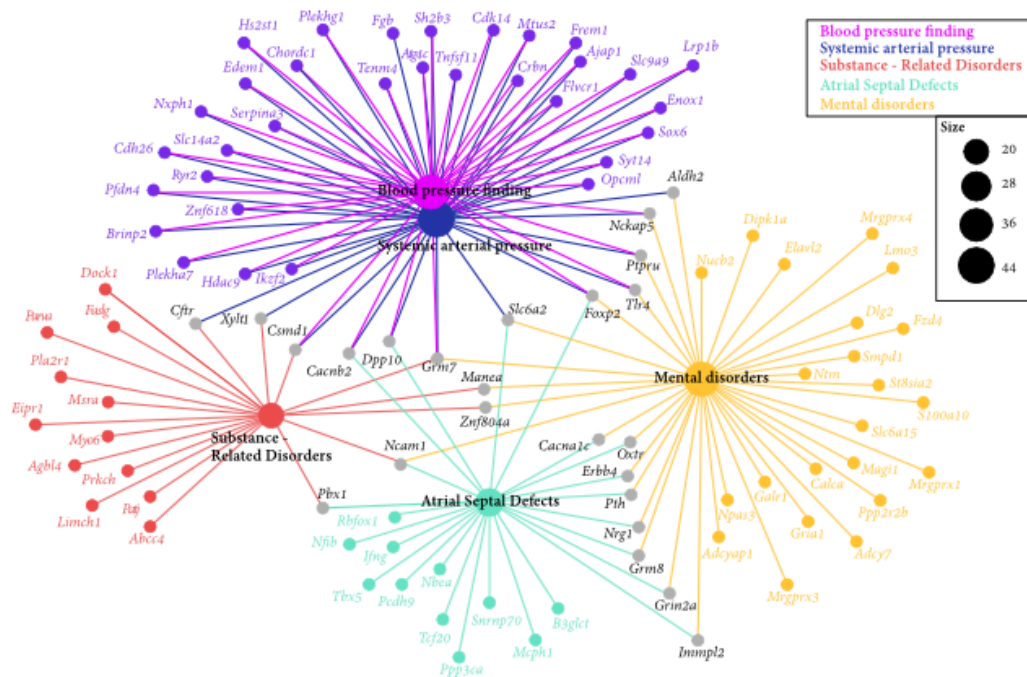

779 **Supplementary figure 10:** Enriched human diseases among genes closest to significant SNPs from  
780 association analysis.

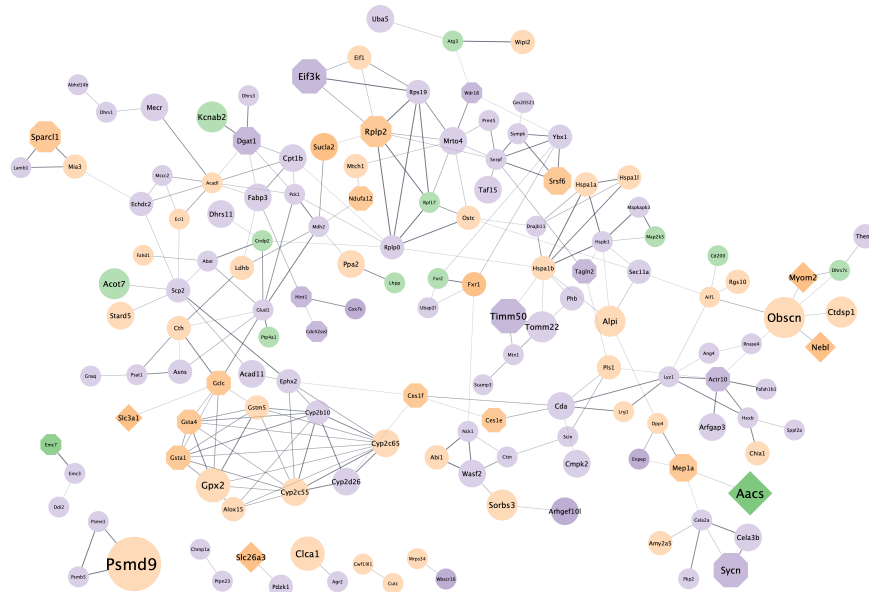

781 **Supplementary figure 11:** STRING (Szklarczyk et al., 2019) protein-protein interaction network of  
782 proteins that are differentially expressed in the intestine (small intestine and colon) of germ-free  
783 (GF) mice compared to conventionally raised mice, found in the present study. The color of the  
784 network nodes indicates whether the QTL hit was found using the DNA abundances (green),  
785 RNA abundances (purple) or was found in both (orange). The shape represents if the gene of the  
786 protein was the closest gene to the significant SNP (rectangle), if the gene was also found in QTLs  
787 of other studies (octagon), a combination of both (diamond), or only differentially expressed in GF  
788 mice vs. conventionally raised mice. The node size expresses the number of taxa where the gene  
789 was found in a QTL. The edges represent protein-protein interactions, where the line thickness in-  
790 dicates the strength of the data support from text mining, experiments, databases, co-expression,  
791 gene-fusion, and co-occurrence.

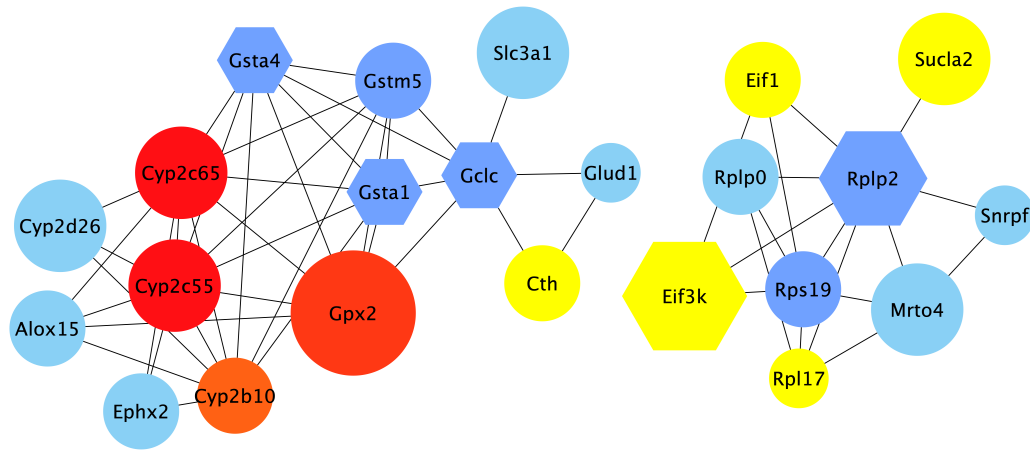

792 **Supplementary figure 12:** Visualization of the top hub genes calculated with the MCC algo-  
793 rithm and their first neighbors from the protein-protein interaction (PPI) network of genes  
794 found in intervals in present study that are also differentially expressed in germ-free versus  
795 conventionally raised mice. Edges represent the protein-protein associations. The red nodes  
796 represent genes with a high degree (= hub genes), and the yellow nodes with a low degree,  
797 while the blue nodes represent their first neighbors. All nodes shown are differentially ex-  
798 pressed in GF mice. Hexagon shaped nodes are genes/proteins also found associated with  
799 gut microbiome abundances in other mouse QTL studies, and round nodes are 'only' differ-  
800 entially expressed in GF mice. The size of the node is an indication of the amount of taxa as-  
801 sociated with the gene.

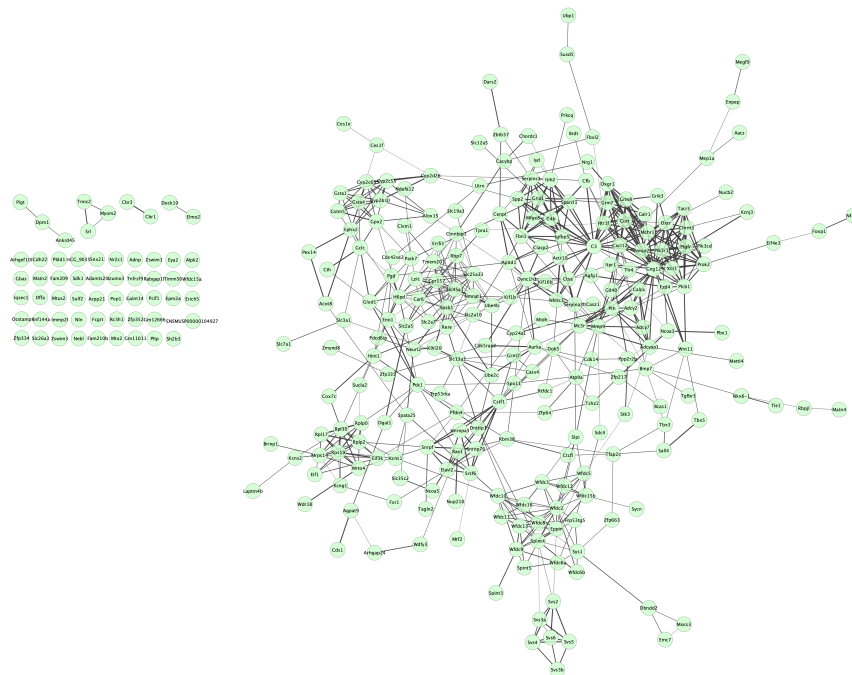

802  
803  
804

**Supplementary figure 13:** Original protein protein interaction (PPI) network of 304 candidate genes closest to SNPs significantly associated with bacterial abundances. Generated in STRING (Szklarczyk et al., 2019) and Cytoscape (Shannon et al., 2003).

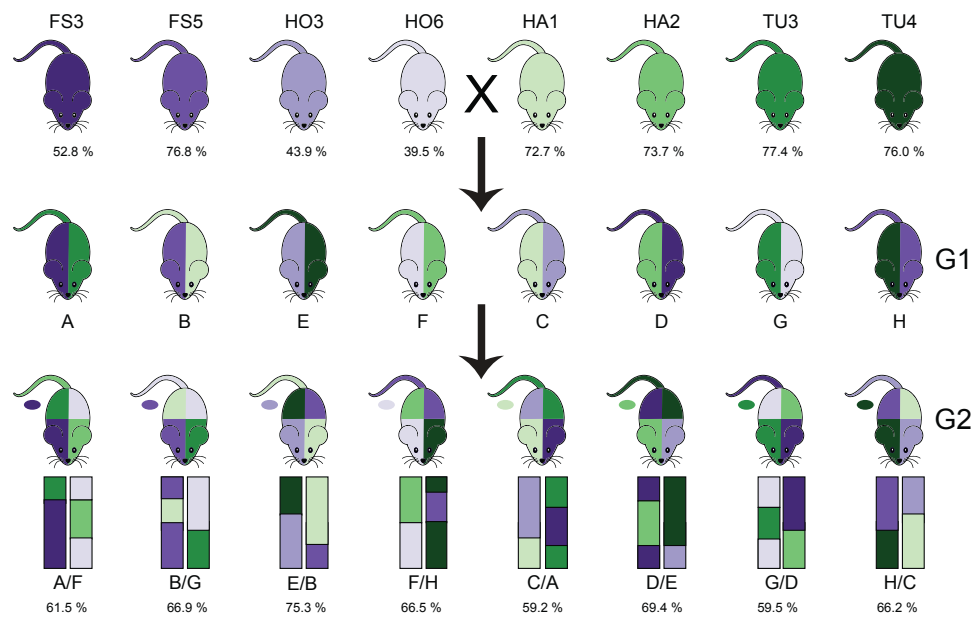

805 **Supplementary figure 14:** Overview of the intercross design. G0 mice are from eight partially  
 806 inbred lines derived from mice wild-caught in four hybrid zone sites. Hybrid index - the per-  
 807 centage of *musculus* alleles - is reported as the mean for the G0 mice from each line (top), or  
 808 mean of 40 G2s from each subclass (bottom). We performed eight G1 crosses with one line  
 809 with hybrid index ~50% (purple shades) and one line with hybrid index >50% (green  
 810 shades); color on the left side of mouse diagram indicates dam line and right side indicates  
 811 sire line. Next, G1 mice were crossed in eight combinations such that each G2 mouse had one  
 812 grandparent from each of the four breeding stocks, indicated by colors of mouse diagram,  
 813 and representative chromosomes below. Tail color indicates Y chromosome strain, and oval  
 814 indicates mitochondrial strain.



## 815           References

- 816** Abdi, Hervé (2007), ‘The Bonferonni and Šidák Corrections for Multiple Comparisons’, in Salkind, Neil J. (ed.), (Encyclopedia of Measurement and Statistics, SAGE), 9.  
**817**
- 818** Alhasson, Firas, et al. (2017), ‘Altered gut microbiome in a mouse model of Gulf War Illness causes neuroinflammation and intestinal injury via leaky gut and TLR4 activation’, *PLoS One*, 12 (3), e0172914.  
**819**
- 820** Amato, Katherine R, et al. (2019), ‘Evolutionary trends in host physiology outweigh dietary niche in structuring primate gut microbiomes’, *The ISME journal*, 13 (3), 576-87.  
**821**
- 822** Backhed, F., et al. (2004), ‘The gut microbiota as an environmental factor that regulates fat storage’, *Proceedings of the National Academy of Sciences*, 101 (44), 15718-23.  
**823**
- 824** Bader, Gary D. and Christopher WV Hogue (2003), ‘An automated method for finding molecular complexes in large protein interaction networks’, *BMC Bioinformatics*, 4 (1), 2.  
**825**
- 826** Barton, Nicholas H. and Peter D. Keightley (2002), ‘Understanding quantitative genetic variation’, *Nat. Rev. Genet.*, 3 (1), 11-21.  
**827**
- 828** Beavis, WD (1994), ‘The power and deceit of QTL experiments: lessons from comparative QTL studies’, Proceedings of the forty-ninth annual corn and sorghum industry research conference 250 266.  
**829**
- 830** Belheouane, Meriem, et al. (2017), ‘Improved detection of gene-microbe interactions in the mouse skin microbiota using high-resolution QTL mapping of 16S rRNA transcripts’, *Microbiome*, 5 (1), 1-17.  
**831**
- 832** Benson, Andrew K., et al. (2010), ‘Individuality in gut microbiota composition is a complex polygenic trait shaped by multiple environmental and host genetic factors’, *Proceedings of the National Academy of Sciences of the United States of America*  
**833**  
**834** *Proc. Natl. Acad. Sci. U.S.A.*, 107 (44), 18933-38.
- 835**
- 836** Bonder, Marc Jan, et al. (2016), ‘The effect of host genetics on the gut microbiome’, *Nat. Genet.*, 48 (11), 1407-12.
- 837** Brent Pedersen, Joe Brown (2013), ‘poverlap: significance testing over interval overlaps’,
- 838** Brooks, AW, et al. (2016), ‘Phylosymbiosis: Relationships and Functional Effects of Microbial Communities across Host Evolutionary History.’, *PLoS Biol.*, 14 (11), e2000225.  
**839**
- 840** Brucker, RM and SR Bordenstein (2012a), ‘Speciation by symbiosis.’, *Trends Ecol Evol*, 27 (8), 443-51.
- 841** Brucker, Robert M and Seth R Bordenstein (2012b), ‘The roles of host evolutionary relationships (genus: Nasonia) and development in structuring microbial communities’, *Evolution: International Journal of Organic Evolution*, 66 (2), 349-62.  
**842**  
**843**
- 844** Burke, John M., et al. (2002), ‘Genetic Analysis of Sunflower Domestication’, *Genetics*, 161 (3), 1257-67.
- 845** Callahan, Benjamin J (2016), ‘DADA2 pipeline’, *DADA2*,
- 846** Callahan, Benjamin J, et al. (2016), ‘DADA2: High resolution sample inference from Illumina amplicon data’, *Nature methods*  
**847**
- 848** *Nat Methods*, 13 (7), 581-83.
- 849** Campbell, JH, et al. (2012), ‘Host genetic and environmental effects on mouse intestinal microbiota.’, *ISME J*, 6 (11), 2033-44.  
**850**
- 851** Cani, Patrice D., et al. (2008), ‘Changes in gut microbiota control metabolic endotoxemia-induced inflammation in high-fat diet-induced obesity and diabetes in mice’, *Diabetes*, 57 (6), 1470-81.  
**852**
- 853** Carding, Simon, et al. (2015), ‘Dysbiosis of the gut microbiota in disease’, *Microb. Ecol. Health Dis.*, 26
- 854** Cardoso, JC, et al. (2012), ‘Feeding and the rhodopsin family g-protein coupled receptors in nematodes and arthropods.’, *Front Endocrinol (Lausanne)*, 3 157.  
**855**
- 856** Carmody, RN, et al. (2015), ‘Diet dominates host genotype in shaping the murine gut microbiota.’, *Cell Host Microbe*, 17 (1), 72-84.  
**857**
- 858** Castoldi, Angela, et al. (2015), ‘They Must Hold Tight: Junction Proteins, Microbiota And Immunity In Intestinal Mucosa’, *Current Protein & Peptide Science*  
**859**
- 860** *Curr Protein Pept Sci*, 16 (7), 655-71.
- 861** Chang, Christopher C, et al. (2015), ‘Second-generation PLINK: rising to the challenge of larger and richer datasets’, *GigaScience*  
**862**
- 863** *GigaSci*, 4 (1), 7.
- 864** Chen, Congying, et al. (2018), ‘Contribution of Host Genetics to the Variation of Microbial Composition of Cecum Lumen and Feces in Pigs’, *Frontiers in Microbiology*  
**865**

- 866** *Front. Microbiol.*, 9
- 867** Chen, Haiwei, et al. (2019), 'A forward chemical genetic screen reveals gut microbiota metabolites that modulate host physiology', *Cell*, 177 (5), 1217-1231.e18.
- 868**
- 869** Chu, Hiutung and Sarkis K Mazmanian (2013), 'Innate immune recognition of the microbiota promotes host-microbial symbiosis', *Nat. Immunol.*, 14 (7), 668-75.
- 870**
- 871** Chung, HJ, et al. (2018), 'Gut Microbiota as a Missing Link Between Nutrients and Traits of Human.', *Front Microbiol.*, 9
- 872** 1510.
- 873** Clapp, M, et al. (2017), 'Gut microbiota's effect on mental health: The gut-brain axis.', *Clin Pract.*, 7 (4), 987.
- 874** Cohen, Louis J., et al. (2017), 'Commensal bacteria make GPCR ligands that mimic human signalling molecules', *Nature*, 549 (7670), 48-53.
- 875**
- 876** Cole, JR, et al. (2014), 'Ribosomal Database Project: data and tools for high throughput rRNA analysis.', *Nucleic Acids Res.*, 42 (Database issue), D633-42.
- 877**
- 878** Colosimo, Dominic A., et al. (2019), 'Mapping Interactions of Microbial Metabolites with Human G-Protein-Coupled Receptors', *Cell Host & Microbe*, 26 (2), 273-282.e7.
- 879**
- 880** Cox, Laura M. and Howard L. Weiner (2018), 'Microbiota Signaling Pathways that Influence Neurologic Disease', *Neurotherapeutics*, 15 (1), 135-45.
- 881**
- 882** Daniel, Noémie, Emelyne Lécuyer, and Benoit Chassaing (2021), 'Host/microbiota interactions in health and diseases—Time for mucosal microbiology', *Mucosal Immunology*, 1-11.
- 883**
- 884** Davenport, Emily R., et al. (2015), 'Genome-Wide Association Studies of the Human Gut Microbiota', *PLoS One*, 10 (11), e0140301.
- 885**
- 886** Davenport, Emily R. (2020), 'Genetic Variation Shapes Murine Gut Microbiota via Immunity', *Trends in Immunology*, 41 (1), 1-3.
- 887**
- 888** Deaver, Jessica A., Sung Y. Eum, and Michal Toborek (2018), 'Circadian Disruption Changes Gut Microbiome Taxa and Functional Gene Composition', *Frontiers in Microbiology*
- 889**
- 890** *Front Microbiol.*, 9 737.
- 891** Delzenne, Nathalie M., et al. (2011), 'Targeting gut microbiota in obesity: effects of prebiotics and probiotics', *Nature Reviews. Endocrinology*
- 892**
- 893** *Nat Rev Endocrinol.*, 7 (11), 639-46.
- 894** Doncheva, Nadezhda T., et al. (2019), 'Cytoscape StringApp: Network Analysis and Visualization of Proteomics Data', *Journal of Proteome Research*
- 895**
- 896** *J Proteome Res.*, 18 (2), 623-32.
- 897** Erdman, S.E. and T. Poutahidis (2016), 'Microbes and Oxytocin', *131 (Int. Rev. Neurobiol., Elsevier)*, 91-126.
- 898** Fabian, Scheipl, Greven Sonja, and Kuechenhoff Helmut (2008), 'Size and power of tests for a zero random effect variance or polynomial regression in additive and linear mixed models.', *Computational Statistics & Data Analysis*, 52 (7), 3283-99.
- 899**
- 900**
- 901** Falconer, D. S (1996), *Introduction to quantitative genetics*, (Harlow, England: Prentice Hall).
- 902** Flux, M. C. and Christopher A. Lowry (2020), 'Finding intestinal fortitude: Integrating the microbiome into a holistic view of depression mechanisms, treatment, and resilience', *Neurobiology of Disease*
- 903**
- 904** *Microbiome in neurological and psychiatric disease*
- 905** *Neurobiology of Disease*, 135 104578.
- 906** Fonken, Laura K., et al. (2010), 'Light at night increases body mass by shifting the time of food intake', *Proceedings of the National Academy of Sciences*
- 907**
- 908** *PNAS*, 107 (43), 18664-69.
- 909** Foster, Jane A., Linda Rinaman, and John F. Cryan (2017), 'Stress & the gut-brain axis: Regulation by the microbiome', *Neurobiology of Stress*, 7 124-36.
- 910**
- 911** Fukata, Masayuki and Moshe Arditi (2013), 'The role of pattern recognition receptors in intestinal inflammation', *Mucosal immunology*, 6 (3), 451-63.
- 912**
- 913** Gastelum, C, et al. (2021), 'Adaptive Changes in the Central Control of Energy Homeostasis Occur in Response to Variations in Energy Status.', *Int J Mol Sci.*, 22 (5), 2728.
- 914**
- 915** Gautam, D, et al. (2006), 'A critical role for beta cell M3 muscarinic acetylcholine receptors in regulating insulin release and blood glucose homeostasis in vivo.', *Cell Metab.*, 3 (6), 449-61.
- 916**
- 917** Gerald, A, et al. (2008), 'Inferring the history of speciation in house mice from autosomal, X-linked, Y-linked and mitochondrial genes.', *Mol Ecol.*, 17 (24), 5349-63.
- 918**

- 919** Gevers, Dirk, et al. (2014), 'The treatment-naive microbiome in new-onset Crohn's disease', *Cell host & microbe*, 15 (3),  
**920** 382-92.
- 921** Gogarten, Jan F, et al. (2021), 'Primate phageomes are structured by superhost phylogeny and environment', *Proceedings*  
**922** *of the National Academy of Sciences*, 118 (15),
- 923** Goodrich, Julia K., et al. (2014), 'Human genetics shape the gut microbiome', *Cell*, 159 (4), 789-99.
- 924** Goodrich, Julia K., et al. (2016), 'Genetic Determinants of the Gut Microbiome in UK Twins', *Cell host & microbe*,
- 925** Gould, AL, et al. (2018), 'Microbiome interactions shape host fitness.', *Proc. Natl. Acad. Sci. U S A*, 115 (51), E11951-60.
- 926** Gregory R. Warnes, Ben Bolker and Thomas Lumley (2020), 'gtools: Various R Programming Tools',
- 927** Grieneisen, L, et al. (2021), 'Gut microbiome heritability is nearly universal but environmentally contingent.', *Science*,  
**928** 373 (6551), 181-86.
- 929** Groussin, Mathieu, et al. (2017), 'Unraveling the processes shaping mammalian gut microbiomes over evolutionary time',  
**930** *Nature Comm.*, 8 (1), 14319.
- 931** Hehemann, Jan-Hendrik, et al. (2010), 'Transfer of carbohydrate-active enzymes from marine bacteria to Japanese gut micro-  
**932** biota', *Nature*, 464 (7290), 908-12.
- 933** Hollander, Daniel and Jonathan D. Kaunitz (2020), 'The "Leaky Gut": Tight Junctions but Loose Associations', *Digestive*  
**934** *Diseases and Sciences*
- 935** *Dig Dis Sci*, 65 (5), 1277-87.
- 936** Hua, Yan, et al. (2020), 'Gut microbiota and fecal metabolites in captive and wild North China leopard (*Panthera pardus*  
**937** *japonensis*) by comparison using 16 s rRNA gene sequencing and LC/MS-based metabolomics', *BMC Veterinary Re-*  
**938** *search*, 16 (1),
- 939** Hughes, David A., et al. (2020), 'Genome-wide associations of human gut microbiome variation and implications for  
**940** causal inference analyses', *Nature Microbiology*, 5 (9), 1079-87.
- 941** Ishida, Sachiko, et al. (2020), 'Genome-wide association studies and heritability analysis reveal the involvement of host  
**942** genetics in the Japanese gut microbiota', *Communications Biology*
- 943** *Commun Biol*, 3
- 944** Kelly, John R., et al. (2015), 'Breaking Down the Barriers: The Gut Microbiome, Intestinal Permeability and Stress-relat-  
**945** ed Psychiatric Disorders', *Frontiers in Cellular Neuroscience*
- 946** *Front. Cell. Neurosci.*, 9
- 947** Kemis, Julia H., et al. (2019), 'Genetic determinants of gut microbiota composition and bile acid profiles in mice', *PLoS*  
**948** *Genet.*, 15 (8), e1008073.
- 949** Khan, Farhat, et al. (2021), 'IBDDB: a manually curated and text-mining-enhanced database of genes involved in inflam-  
**950** matory bowel disease', *Database*, 2021
- 951** Klug-Micu, GM, et al. (2013), 'CD40 ligand and interferon- $\gamma$  induce an antimicrobial response against *Mycobacterium*  
**952** tuberculosis in human monocytes.', *Immunology*, 139 (1), 121-28.
- 953** Kohl, KD and MD Dearing (2014), 'Wild-caught rodents retain a majority of their natural gut microbiota upon entrance  
**954** into captivity.', *Environ Microbiol Rep*, 6 (2), 191-95.
- 955** Korach-Rechtman, H, et al. (2019), 'Murine Genetic Background Has a Stronger Impact on the Composition of the Gut  
**956** Microbiota than Maternal Inoculation or Exposure to Unlike Exogenous Microbiota.', *Appl. Environ. Microbiol.*, 85 (18),  
**957** e00826-19.
- 958** Kovacs, Amir, et al. (2011), 'Genotype is a stronger determinant than sex of the mouse gut microbiota', *Microbial ecolo-*  
**959** *gy*, 61 (2), 423-28.
- 960** Kurilshikov, Alexander, et al. (2021), 'Large-scale association analyses identify host factors influencing human gut micro-  
**961** biome composition', *Nat. Genet.*, 53 (2), 156-65.
- 962** Leamy, Larry J, et al. (2014), 'Host genetics and diet, but not immunoglobulin A expression, converge to shape composi-  
**963** tional features of the gut microbiome in an advanced intercross population of mice', *Genome Biology*
- 964** *Genome Biol*, 15 (12),
- 965** Ley, RE, et al. (2006), 'Microbial ecology: human gut microbes associated with obesity.', *Nature*, 444 (7122), 1022-23.
- 966** Li, J. and L. Ji (2005), 'Adjusting multiple testing in multilocus analyses using the eigenvalues of a correlation matrix',  
**967** *Heredity*, 95 (3), 221-27.
- 968** Lim, SJ and SR Bordenstein (2020), 'An introduction to phylosymbiosis.', *Proc Biol Sci*, 287 (1922), 20192900.
- 969** Linnenbrink, Miriam, et al. (2013), 'The role of biogeography in shaping diversity of the intestinal microbiota in house  
**970** mice', *Molecular Ecology*, 22 (7), 1904-16.
- 971** Lynch, SV and O Pedersen (2016), 'The Human Intestinal Microbiome in Health and Disease.', *N. Engl. J. Med.*, 375

- 972** (24), 2369-79.
- 973** Malaguarnera, L (2020), 'Vitamin D and microbiota: Two sides of the same coin in the immunomodulatory aspects.', *Int Immunopharmacol*, 79 106112.
- 974**
- 975** McKnite, Autumn M., et al. (2012), 'Murine Gut Microbiota Is Defined by Host Genetics and Modulates Variation of Metabolic Traits', *PLoS One*, 7 (6),
- 976**
- 977** McMurdie, Paul J and Susan Holmes (2013), 'phyloseq: an R package for reproducible interactive analysis and graphics of microbiome census data', *PLoS One*, 8 (4), e61217.
- 978**
- 979** Metwaly, Amira, et al. (2020), 'Integrated microbiota and metabolite profiles link Crohn's disease to sulfur metabolism', *Nature Comm.*, 11 (1),
- 980**
- 981** Walsh, Michael Lynch and Bruce (1998), *Genetics and Analysis of Quantitative Traits*, (Sunderland, MA: Sinauer).
- 982** Miller, Craig T., et al. (2014), 'Modular Skeletal Evolution in Sticklebacks Is Controlled by Additive and Clustered Quantitative Trait Loci', *Genetics*, 197 (1), 405-20.
- 983**
- 984** Mills, Robert H., et al. (2020), 'Organ-level protein networks as a reference for the host effects of the microbiome', *Genome Research*
- 985**
- 986** *Genome Res.*, 30 (2), 276-86.
- 987** Moeller, Andrew H., et al. (2016), 'Cospeciation of gut microbiota with hominids', *Science (New York, N.Y.)*
- 988** *Science*, 353 (6297), 380-82.
- 989** Moeller, Andrew H., et al. (2019), 'Experimental Evidence for Adaptation to Species-Specific Gut Microbiota in House Mice', *mSphere*, 4
- 990**
- 991** Moran, Nancy A. and Daniel B. Sloan (2015), 'The Hologenome Concept: Helpful or Hollow', *PLoS Biol.*, 13 (12), e1002311.
- 992**
- 993** Morgan, Andrew P., et al. (2015), 'The Mouse Universal Genotyping Array: From Substrains to Subspecies', *G3: GenesGenomesGenetics*
- 994** *G3 (Bethesda)*, 6 (2), 263-79.
- 995**
- 996** Moya, Andrés and Manuel Ferrer (2016), 'Functional Redundancy-Induced Stability of Gut Microbiota Subjected to Disturbance', *Trends Microbiol.*, 24 (5), 402-13.
- 997**
- 998** Nagpal, Ravinder, et al. (2020), 'Role of TRP Channels in Shaping the Gut Microbiome', *Pathogens*, 9
- 999** Neumann, Philipp-Alexander, et al. (2014), 'Gut Commensal Bacteria and Regional Wnt Gene Expression in the Proximal Versus Distal Colon', *The American Journal of Pathology*
- 1000** *Am J Pathol*, 184 (3), 592-99.
- 1001**
- 1002** Nicholson, Jeremy K., et al. (2012), 'Host-gut microbiota metabolic interactions', *Science (New York, N.Y.)*
- 1003** *Science*, 336 (6086), 1262-67.
- 1004** Nyholt, Dale R. (2019), 'matSpD local version - Statistical and Genomic Epidemiology Laboratory (SGEL)',
- 1005** O'Connor, Annalouise, et al. (2014), 'Responsiveness of cardiometabolic-related microbiota to diet is influenced by host genetics', *Mammalian Genome*, 25 (11), 583-99.
- 1006**
- 1007** Ochman, Howard, et al. (2010), 'Evolutionary relationships of wild hominids recapitulated by gut microbial communities', *PLoS Biol.*, 8 (11), e1000546.
- 1008**
- 1009** Org, Elin, et al. (2015), 'Genetic and environmental control of host-gut microbiota interactions', *Genome Research*
- 1010** *Genome Res.*, 25 (10), 1558-69.
- 1011** Org, Elin and Aldons J. Lusi (2018), 'Using the natural variation of mouse populations to understand host-gut microbiome interactions', *Drug discovery today: Disease models*
- 1012** *Drug Discov Today Dis Models*, 28 61-71.
- 1013**
- 1014** Ott, SJ, et al. (2004), 'Reduction in diversity of the colonic mucosa associated bacterial microflora in patients with active inflammatory bowel disease', *Gut*, 53 (5), 685-93.
- 1015**
- 1016** Pallares, LF, et al. (2014), 'Use of a natural hybrid zone for genomewide association mapping of craniofacial traits in the house mouse.', *Mol Ecol*, 23 5756-70.
- 1017**
- 1018** Pandey, Shubhi, Jagannath Maharana, and Arun K. Shukla (2019), 'The Gut Feeling: GPCRs Enlighten the Way', *Cell Host & Microbe*, 26 (2), 160-62.
- 1019**
- 1020** Papa, Eliseo, et al. (2012), 'Non-invasive mapping of the gastrointestinal microbiota identifies children with inflammatory bowel disease', *PLoS One*, 7 (6), e39242.
- 1021**
- 1022** Parker, Bianca J., et al. (2020), 'The Genus *Alistipes*: Gut Bacteria With Emerging Implications to Inflammation, Cancer, and Mental Health', *Frontiers in Immunology*
- 1023**

- 1024** *Front. Immunol.*, 11
- 1025** Parker, CC, et al. (2014), 'High-resolution genetic mapping of complex traits from a combined analysis of F2 and advanced intercross mice.', *Genetics*, 198 (1), 103-16.
- 1026**
- 1027** Peier, Andrea, et al. (2009), 'The Antiobesity Effects of Centrally Administered Neuromedin U and Neuromedin S Are Mediated Predominantly by the Neuromedin U Receptor 2 (NMUR2)', *Endocrinology*, 150 (7), 3101-9.
- 1028**
- 1029** Peng, Zhi, et al. (2020), 'The Gut Microbiome Is Associated with Clinical Response to Anti-PD-1/PD-L1 Immunotherapy in Gastrointestinal Cancer', *Cancer Immunology Research*
- 1030**
- 1031** *Cancer Immunol Res*, 8 (10), 1251-61.
- 1032** Qin, Junjie, et al. (2012), 'A metagenome-wide association study of gut microbiota in type 2 diabetes', *Nature*, 490 (7418), 55-60.
- 1033**
- 1034** Qin, Youwen, et al. (2020), 'Combined effects of host genetics and diet on human gut microbiota and incident disease in a single population cohort',
- 1035**
- 1036** Rapp, K (1972), 'HAN-rotation, a new system for rigorous outbreeding', *Z. Versuchstierk.*, 14 133-42.
- 1037** Rausch, P, et al. (2016), 'Analysis of factors contributing to variation in the C57BL/6J fecal microbiota across German animal facilities.', *Int. J. Med. Microbiol.*, 306 (5), 343-55.
- 1038**
- 1039** Rehman, A, et al. (2016), 'Geographical patterns of the standing and active human gut microbiome in health and IBD.', *Gut*, 65 (2), 238-48.
- 1040**
- 1041** Reichardt, Nicole, et al. (2018), 'Specific substrate-driven changes in human faecal microbiota composition contrast with functional redundancy in short-chain fatty acid production', *The ISME Journal*, 12 (2), 610-22.
- 1042**
- 1043** Ricklin, D, et al. (2016), 'Complement component C3 - The "Swiss Army Knife" of innate immunity and host defense.', *Immunol. Rev.*, 274 (1), 33-58.
- 1044**
- 1045** Rieseberg, Loren H, Margaret A Archer, and Robert K Wayne (1999), 'Transgressive segregation, adaptation and speciation', *Heredity*, 83 (4), 363-72.
- 1046**
- 1047** Rolig, AS, et al. (2015), 'Individual Members of the Microbiota Disproportionately Modulate Host Innate Immune Responses.', *Cell Host Microbe*, 18 (5), 613-20.
- 1048**
- 1049** Rosshart, Stephan P., et al. (2017), 'Wild Mouse Gut Microbiota Promotes Host Fitness and Improves Disease Resistance', *Cell*, 171 (5), 1015-1028.e13.
- 1050**
- 1051** Roth, TL, et al. (2019), 'Reduced Gut Microbiome Diversity and Metabolome Differences in Rhinoceros Species at Risk for Iron Overload Disorder.', *Front Microbiol*, 10 2291.
- 1052**
- 1053** Rowland, Ian, et al. (2018), 'Gut microbiota functions: metabolism of nutrients and other food components', *European Journal of Nutrition*
- 1054**
- 1055** *Eur J Nutr*, 57 (1), 1-24.
- 1056** Rühlemann, Malte Christoph, et al. (2021), 'Genome-wide association study in 8,956 German individuals identifies influence of ABO histo-blood groups on gut microbiome', *Nat. Genet.*, 1-9.
- 1057**
- 1058** Saito, Yumiko, et al. (1999), 'Molecular characterization of the melanin-concentrating-hormone receptor', *Nature*, 400 (6741), 265-69.
- 1059**
- 1060** Sarkar, Amar, et al. (2020), 'The role of the microbiome in the neurobiology of social behaviour', *Biol. Rev.*, 95 (5), 1131-66.
- 1061**
- 1062** Sethi, JK and AJ Vidal-Puig (2008), 'Wnt signalling at the crossroads of nutritional regulation.', *Biochem. J.*, 416 (2), e11-3.
- 1063**
- 1064** Shannon, Paul, et al. (2003), 'Cytoscape: a software environment for integrated models of biomolecular interaction networks', *Genome Research*
- 1065**
- 1066** *Genome Res*, 13 (11), 2498-504.
- 1067** Shi, L and BP Tu (2015), 'Acetyl-CoA and the regulation of metabolism: mechanisms and consequences.', *Curr. Opin. Cell Biol.*, 33 125-31.
- 1068**
- 1069** Singh, Parul, et al. (2020), 'The potential role of vitamin D supplementation as a gut microbiota modifier in healthy individuals', *Scientific Reports*, 10 (1), 21641.
- 1070**
- 1071** Škrabar, N, et al. (2018), 'Using the *Mus musculus* hybrid zone to assess covariation and genetic architecture of limb bone lengths.', *Mol Ecol Resour*, 18 (4), 908-21.
- 1072**
- 1073** Smith, Ashley E., et al. (2019), 'Binge-Type Eating in Rats is Facilitated by Neuromedin U Receptor 2 in the Nucleus Accumbens and Ventral Tegmental Area', *Nutrients*, 11 (2), 327.
- 1074**
- 1075** Snijders, Antoine M., et al. (2016), 'Influence of early life exposure, host genetics and diet on the mouse gut microbiome and metabolome', *Nature Microbiology*, 2 16221.
- 1076**
- 1077** Spor, Aymé, Omry Koren, and Ruth Ley (2011), 'Unravelling the effects of the environment and host genotype on the gut

- 1078** microbiome', *Nature Reviews Microbiology*, 9 (4), 279-90.
- 1079** Sriram, K and PA Insel (2018), 'G Protein-Coupled Receptors as Targets for Approved Drugs: How Many Targets and  
**1080** How Many Drugs', *Mol. Pharmacol.*, 93 (4), 251-58.
- 1081** Steffen Durinck, Paul T. Spellman, Ewan
- 1082** Birney and Wolfgang Huber (2009), 'Mapping identifiers for the integration of genomic datasets with the  
**1083** R/Bioconductor package biomaRt.', *Nature Protocols*, 4 1184-91.
- 1084** Suzuki, TA (2017), 'Links between Natural Variation in the Microbiome and Host Fitness in Wild Mammals.', *Integr  
1085* *Comp Biol*, 57 (4), 756-69.
- 1086** Suzuki, TA, et al. (2020), 'The gut microbiota and Bergmann's rule in wild house mice.', *Mol Ecol*, 29 (12), 2300-11.
- 1087** Suzuki, Taichi A and Ruth E Ley (2020), 'The role of the microbiota in human genetic adaptation', *Science*, 370 (6521),
- 1088** Suzuki, Taichi A., et al. (2019), 'Host genetic determinants of the gut microbiota of wild mice', *Molecular Ecology*, 28  
**1089** (13), 3197-207.
- 1090** Szklarczyk, Damian, et al. (2019), 'STRING v11: protein-protein association networks with increased coverage, support-  
**1091** ing functional discovery in genome-wide experimental datasets', *Nucleic Acids Research*
- 1092** *Nucleic Acids Res*, 47 (D1), D607-13.
- 1093** Tanahashi, Yasuyuki, et al. (2009), 'Multiple muscarinic pathways mediate the suppression of voltage-gated Ca<sup>2+</sup>  
**1094** channels in mouse intestinal smooth muscle cells', *Br. J. Pharmacol.*, 158 (8), 1874-83.
- 1095** Taras, David, et al. (2002), 'Reclassification of *Eubacterium formicigenerans* Holdeman and Moore 1974 as *Dorea formi-  
1096* cigenans gen. nov., comb. nov., and description of *Dorea longicatena* sp. nov., isolated from human faeces.', *Internatio-  
1097* *nal Journal of Systematic and Evolutionary Microbiology*, 52 (2), 423-28.
- 1098** Thaïss, Christoph A., et al. (2014), 'Transkingdom control of microbiota diurnal oscillations promotes metabolic home-  
**1099** ostasis', *Cell*, 159 (3), 514-29.
- 1100** Thaïss, Christoph A., Maayan Levy, and Eran Elinav (2015a), 'Chronobiomics: The Biological Clock as a New Principle  
**1101** in Host-Microbial Interactions', *PLoS Pathog.*, 11 (10), e1005113.
- 1102** Thaïss, Christoph A., et al. (2015b), 'A day in the life of the meta-organism: diurnal rhythms of the intestinal microbiome  
**1103** and its host', *Gut Microbes*, 6 (2), 137-42.
- 1104** Thaïss, Christoph A., et al. (2016), 'Microbiota Diurnal Rhythmicity Programs Host Transcriptome Oscillations', *Cell*,  
**1105** 167 (6), 1495-1510.e12.
- 1106** Tian, Liang, et al. (2020), 'Deciphering functional redundancy in the human microbiome', *Nature Comm.*, 11 (1),
- 1107** Toderici, M, et al. (2016), 'Identification of Regulatory Mutations in SERPINC1 Affecting Vitamin D Response Elements  
**1108** Associated with Antithrombin Deficiency.', *PLoS One*, 11 (3), e0152159.
- 1109** Townsend, KL, et al. (2012), 'Bone morphogenetic protein 7 (BMP7) reverses obesity and regulates appetite through a  
**1110** central mTOR pathway.', *FASEB J.*, 26 (5), 2187-96.
- 1111** Turnbaugh, Peter J., et al. (2009), 'A core gut microbiome in obese and lean twins', *Nature*, 457 (7228), 480-84.
- 1112** Turnbaugh, PJ, et al. (2008), 'Diet-induced obesity is linked to marked but reversible alterations in the mouse distal gut  
**1113** microbiome.', *Cell Host Microbe*, 3 (4), 213-23.
- 1114** Turner, Leslie M., Denise J. Schwahn, and Bettina Harr (2012), 'Reduced Male Fertility Is Common but Highly Variable  
**1115** in Form and Severity in a Natural House Mouse Hybrid Zone', *Evolution*, 66 (2), 443-58.
- 1116** Turner, Leslie M. and Bettina Harr (2014), 'Genome-wide mapping in a house mouse hybrid zone reveals hybrid sterility  
**1117** loci and Dobzhansky-Muller interactions', *eLife*, 3 e02504.
- 1118** Turpin, W., et al. (2016), 'Association of host genome with intestinal microbial composition in a large healthy cohort',  
**1119** *Nat. Genet.*, 48 (11), 1413-17.
- 1120** Vaga, Stefania, et al. (2020), 'Compositional and functional differences of the mucosal microbiota along the intestine of  
**1121** healthy individuals', *Scientific Reports*, 10 (1),
- 1122** Valerie, Obenchain, et al. (2014), 'VariantAnnotation: a Bioconductor package for exploration and annotation of genetic  
**1123** variants', *Bioinformatics*, 30 (14), 2076-78.
- 1124** Velloso, Licio A., Franco Folli, and Mario J. Saad (2015), 'TLR4 at the Crossroads of Nutrients, Gut Microbiota, and  
**1125** Metabolic Inflammation', *Endocrine Reviews*
- 1126** *Endocr Rev*, 36 (3), 245-71.
- 1127** Wang, Jun, et al. (2015), 'Analysis of intestinal microbiota in hybrid house mice reveals evolutionary divergence in a ver-  
**1128** tebrate hologenome', *Nature Communications*
- 1129** *Nat Commun*, 6
- 1130** Wang, Jun, et al. (2016), 'Genome-wide association analysis identifies variation in vitamin D receptor and other host fac-

- 1131** tors influencing the gut microbiota', *Nat. Genet.*, 48 (11), 1396-406.
- 1132** Wang, Y, et al. (2010), 'Regional mucosa-associated microbiota determine physiological expression of TLR2 and TLR4 in  
**1133** murine colon.', *PLoS One*, 5 (10), e13607.
- 1134** Weldon, L, et al. (2015), 'The Gut Microbiota of Wild Mice.', *PLoS One*, 10 (8), e0134643.
- 1135** Wu, Guangyan, et al. (2018), 'Light exposure influences the diurnal oscillation of gut microbiota in mice', *Biochemical  
1136 and Biophysical Research Communications*
- 1137** *Biochem Biophys Res Commun*, 501 (1), 16-23.
- 1138** Yang, M, et al. (2020a), 'Mucosal-Associated Microbiota Other Than Luminal Microbiota Has a Close Relationship With  
**1139** Diarrhea-Predominant Irritable Bowel Syndrome.', *Front. Cell. Infect. Microbiol.*, 10 515614.
- 1140** Yang, Q, et al. (2020b), 'Role of Dietary Nutrients in the Modulation of Gut Microbiota: A Narrative Review.', *Nutrients*,  
**1141** 12 (2), E381.
- 1142** Yasuda, K, et al. (2021), 'Elucidation of metabolic pathways of 25-hydroxyvitamin D3 mediated by CYP24A1 and  
**1143** CYP3A using Cyp24a1 knockout rats generated by CRISPR/Cas9 system.', *J. Biol. Chem.*, 296 100668.
- 1144** Yatsunencko, Tanya, et al. (2012), 'Human gut microbiome viewed across age and geography', *Nature*, 486 (7402),  
**1145** 222-27.
- 1146** Yi, Z and GA Bishop (2015), 'Regulatory role of CD40 in obesity-induced insulin resistance.', *Adipocyte*, 4 (1), 65-69.
- 1147** Yu, Guangchuang, et al. (2012), 'clusterProfiler: an R package for comparing biological themes among gene clusters',  
**1148** *Omics: a journal of integrative biology*, 16 (5), 284-87.
- 1149** Zhou, Xiang and Matthew Stephens (2012), 'Genome-wide efficient mixed-model analysis for association studies', *Nat.  
1150* *Genet.*, 44 (7), 821-24.
- 1151** Ziyatdinov, Andrey, et al. (2018), 'lme4qtl: linear mixed models with flexible covariance structure for genetic studies of  
**1152** related individuals', *BMC Bioinformatics*, 19 (1), 1-5.
